# Supplementary material for: QTL Map Meets Population Genomics: An Application to Rice
Source: PLoS One. 2013 Dec 23;8(12):e83720. doi: 10.1371/journal.pone.0083720 (PMC3871663; doi:10.1371/journal.pone.0083720)
Supplement: Dataset S3 — Sites with variants fixed in cultivated rice and FST ≥ 0.7 in gene regions of each low diversity region. (XLS) [file pone.0083720.s011.xls]

## Sheet: S01chr01
Genes in low diversity regions that have variants fixed in O. sativa
Genes	Transcripts	Directions	Positions	Variationa	Products	Variantsb
						OM	1	2	3	4	5	6	7	8	9	10	11	12	13	14	15	16	17	18	19	20	21	22	23	24	25	26	27	28	29	30	31	32
Os01g0538000	t01	For	21312416	5'UTR:-89(-2377)	Conserved hypothetical protein. (t01)	N	N	N	N	C	C	T	C	C	N	C	T	N	T	N	N	N	T	N	N	N	N	T	T	T	T	T	N	T	T	T	T	T
Os01g0538000	t02	For	21312416	5'UTR:-89(-2377)	Similar to cDNA; clone: J065161O13; full insert sequence. (t02)	N	N	N	N	C	C	T	C	C	N	C	T	N	T	N	N	N	T	N	N	N	N	T	T	T	T	T	N	T	T	T	T	T
Os01g0538000	t03	For	21312416	5'UTR:-115(-2377)	Similar to cDNA; clone: J065161O13; full insert sequence. (t03)	N	N	N	N	C	C	T	C	C	N	C	T	N	T	N	N	N	T	N	N	N	N	T	T	T	T	T	N	T	T	T	T	T
Os01g0543100	t01	For	21692444	5'UTR:-197(-264)	Similar to Peroxidase 72 precursor (EC 1.11.1.7) (Atperox P72) (PRXR8) (ATP6a).	A	A	A	A	A	A	A	T	A	A	T	T	T	T	T	T	T	T	T	T	T	T	T	T	T	T	T	T	T	T	T	T	T
Os01g0543100	t01	For	21692650	5'UTR:+9(-58)	Similar to Peroxidase 72 precursor (EC 1.11.1.7) (Atperox P72) (PRXR8) (ATP6a).	C	C-ACT	C-ACT	C-ACT	C-ACT	C-ACT	C-ACT	C	C-ACT	C-ACT	C	C	C	C	C	C	C	C	C	C	C	C	C	C	C	C	C	C	C	C	C	C	C
Os01g0543100	t01	For	21692678	5'UTR:+37(-30)	Similar to Peroxidase 72 precursor (EC 1.11.1.7) (Atperox P72) (PRXR8) (ATP6a).	T	C	C	C	C	C	C	T	C	C	T	T	T	T	T	T	T	T	T	T	T	T	T	T	T	T	T	T	T	T	T	T	T
Os01g0543100	t01	For	21692693	5'UTR:+52(-15)	Similar to Peroxidase 72 precursor (EC 1.11.1.7) (Atperox P72) (PRXR8) (ATP6a).	A	A	A	A	A	A	A	C	A	A	C	C	C	C	C	C	C	C	C	C	C	C	C	C	C	C	C	C	C	C	C	C	C
Os01g0543100	t01	For	21692747	Rep:GTC(V)->ATC(I)	Similar to Peroxidase 72 precursor (EC 1.11.1.7) (Atperox P72) (PRXR8) (ATP6a).	G	G	G	G	G	G	G	A	G	G	A	A	A	A	A	A	A	A	A	A	A	A	A	A	A	A	A	A	A	A	A	A	A
Os01g0543100	t01	For	21693136	Rep:ACG(T)->ATG(M)	Similar to Peroxidase 72 precursor (EC 1.11.1.7) (Atperox P72) (PRXR8) (ATP6a).	N	C	C	C	C	C	S	T	C	C	T	T	T	T	T	T	T	T	T	T	T	T	T	T	T	T	T	T	T	T	T	T	T
Os01g0543100	t01	For	21696593	Rep:AAG(K)->AGG(R)	Similar to Peroxidase 72 precursor (EC 1.11.1.7) (Atperox P72) (PRXR8) (ATP6a).	A	A	A	A	A	A	A	G	A	A	G	G	G	G	G	G	G	G	G	G	G	G	G	G	G	G	G	G	G	G	G	G	G
Os01g0543100	t01	For	21696614	Rep:AGG(R)->AAG(K)	Similar to Peroxidase 72 precursor (EC 1.11.1.7) (Atperox P72) (PRXR8) (ATP6a).	G	G	G	G	G	G	G	A	G	G	A	A	A	A	A	A	A	A	A	A	A	A	A	A	A	A	A	A	A	A	A	A	A
Os01g0543100	t01	For	21696743	Rep:CAG(Q)->CGG(R)	Similar to Peroxidase 72 precursor (EC 1.11.1.7) (Atperox P72) (PRXR8) (ATP6a).	A	A	A	A	A	A	R	G	A	A	G	G	G	G	G	G	G	G	G	G	G	G	G	G	G	G	G	G	G	G	G	G	G
Os01g0544450	t01	For	21826716	Rep:GTG(V)->ATG(M)	Similar to DNA replication licensing factor mcm4.	G	G	G	G	G	G	G	A	G	G	A	A	A	A	A	A	A	A	A	A	A	A	A	A	A	A	A	A	A	A	A	A	A
Os01g0544450	t01	For	21826822	Rep:CGA(R)->CAA(Q)	Similar to DNA replication licensing factor mcm4.	G	G	G	G	G	G	G	A	G	G	A	A	A	A	A	A	A	A	A	A	A	A	A	A	A	A	A	A	A	A	A	A	A
Os01g0545500	t01	Rev	21886988	Rep:GCA(A)->GTA(V)	Hypothetical conserved gene. (t01)	N	G	G	G	G	G	G	A	G	G	A	A	A	A	A	A	A	A	A	A	A	A	A	A	A	A	A	A	A	A	A	A	A
Os01g0545500	t01	Rev	21887067	Rep:TTG(L)->ATG(M)	Hypothetical conserved gene. (t01)	N	A	A	A	A	A	A	T	A	A	T	T	T	T	T	T	T	T	T	T	T	T	T	T	T	T	T	T	T	T	T	T	T
Os01g0545500	t01	Rev	21888621	Rep:CAT(H)->CAA(Q)	Hypothetical conserved gene. (t01)	N	A	A	A	A	A	A	T	A	A	T	T	T	T	T	T	T	T	T	T	T	T	T	T	T	T	T	T	T	T	T	T	T
Os01g0545500	t01	Rev	21890657	Rep:GGG(G)->TGG(W)	Hypothetical conserved gene. (t01)	N	C	C	C	C	C	C	A	C	C	A	A	A	A	A	A	A	A	A	A	A	A	A	A	A	A	A	A	A	A	A	A	A
Os01g0545500	t01	Rev	21890672	Rep:GCT(A)->CCT(P)	Hypothetical conserved gene. (t01)	N	C	C	C	C	C	C	G	C	C	G	G	G	G	G	G	G	G	G	G	G	G	G	G	G	G	G	G	G	G	G	G	G
Os01g0545500	t01	Rev	21890687	Rep:GCG(A)->CCG(P)	Hypothetical conserved gene. (t01)	N	C	C	C	C	C	C	G	C	C	G	G	G	G	G	G	G	G	G	G	G	G	G	G	G	G	G	G	G	G	G	G	G
Os01g0545500	t01	Rev	21891401	5'UTR:+9(-3)	Hypothetical conserved gene. (t01)	N	C	C	C	C	C	C	T	M	C	T	T	T	T	T	T	T	T	T	T	T	T	T	T	T	T	T	T	T	T	T	T	T
Os01g0545900	t00	For	21912241	Rep:CGA(R)->CTA(L)	Pentatricopeptide repeat domain containing protein.	T	G	G	G	G	G	G	T	G	G	T	T	T	T	T	T	T	T	T	T	T	T	T	T	T	T	T	T	T	T	T	T	T
Os01g0545900	t00	For	21912802	Rep:GCA(A)->GTA(V)	Pentatricopeptide repeat domain containing protein.	C	C	C	C	C	C	C	T	C	C	T	T	T	T	T	T	T	T	T	T	T	T	T	T	T	T	T	T	T	T	T	T	T
Os01g0545900	t00	For	21912991	Rep:GTA(V)->GCA(A)	Pentatricopeptide repeat domain containing protein.	C	T	T	T	T	T	T	C	T	T	C	C	C	C	C	C	C	C	C	C	C	C	C	C	C	C	C	C	C	C	C	C	C
Os01g0546000	t01	For	21916168	Rep:CGC(R)->TGC(C)	Similar to predicted protein.	C	C	C	C	C	C	C	T	C	C	T	T	T	T	T	T	T	T	T	T	T	T	T	T	T	T	T	T	T	T	T	T	T
Os01g0546000	t01	For	21916414	Rep:ATA(I)->AGA(R)	Similar to predicted protein.	T	T	T	T	T	T	T	G	T	T	G	G	G	G	G	G	G	G	G	G	G	G	G	G	G	G	G	G	G	G	G	G	G
Os01g0546000	t01	For	21916438	Rep:ACT(T)->AAT(N)	Similar to predicted protein.	A	C	C	C	C	C	C	A	C	C	A	A	A	A	A	A	A	A	A	A	A	A	A	A	A	A	A	A	A	A	A	A	A
Os01g0547000	t01	For	21961395	Rep:GCA(A)->GTA(V)	Similar to LRR19.	C	C	C	C	C	C	C	T	C	C	T	T	T	T	T	T	T	T	T	T	T	T	T	T	T	T	T	T	T	T	T	T	T
Os01g0547000	t01	For	21961460	Rep:AAT(N)->TAT(Y)	Similar to LRR19.	A	A	A	A	A	A	A	T	A	A	T	T	T	T	T	T	T	T	T	T	T	T	T	T	T	T	T	T	T	T	T	T	T
Os01g0547000	t01	For	21961709	Rep:CGG(R)->TGG(W)	Similar to LRR19.	C	C	C	C	C	C	C	T	C	C	T	T	T	T	T	T	T	T	T	T	T	T	T	T	T	T	T	T	T	T	T	T	T
Os01g0547000	t01	For	21961755	Rep:TCT(S)->TAT(Y)	Similar to LRR19.	C	C	C	C	C	C	C	A	C	C	A	A	A	A	A	A	A	A	A	A	A	A	A	A	A	A	A	A	A	A	A	A	A
Os01g0547000	t01	For	21962346	Rep:TTT(V)orGTG(F)->TGG(W)	Similar to LRR19.	C	T	T	T	T	T	T	G	T	T	G	G	G	G	G	G	G	G	G	G	G	G	G	G	G	G	G	G	G	G	G	G	G
Os01g0547000	t01	For	21962444	Rep:CGG(R)->TGG(W)	Similar to LRR19.	C	C	C	C	C	C	C	T	C	C	T	T	T	T	T	T	T	T	T	T	T	T	T	T	T	T	T	T	T	T	T	T	T
aRep indicates variants fixed in OS that result in an amino acid replacement. 5'UTR indicates variants close to annotated transcription start sites (putative promoter regions). The numbers indicate the relative position from the transcription start site, and from the translation start site in brackets. Note that the nucleotides shown here are according to the orientation of transcription. Thus, f…
bThe Sample identifiers correspond to those in Figure 2B. Insertions are indicated as e.g. T+G, where G is inserted after the T. Deletions are indicated as e.g. C-AC, where AC after the C is deleted. If the indels are heterozygous, the variant of the other allele is shown after a slash.

## Sheet: S02chr01
Genes in low diversity regions that have variants fixed in O. sativa
Genes	Transcripts	Directions	Positions	Variationa	Products	Variantsb
						OM	1	2	3	4	5	6	7	8	9	10	11	12	13	14	15	16	17	18	19	20	21	22	23	24	25	26	27	28	29	30	31	32
Os01t0639900	t01	For	27426505	Del:{TCC}8->{TCC}7({S}8->{S}7)	Similar to Carbonic anhydrase; chloroplast precursor (EC 4.2.1.1) (Carbonate dehydratase). (t01)	G	G	G+TCC	G+TCC	G+TCC	N	G	G+TCC	G+TCC	G+TCC	G/G+TCC	G	G	N	G	N	G	N	N	N	N	G	G	G	G	N	G	G	G	N	N	G	G
Os01t0643300	t02	For	27593741	5'UTR:+100(-7)	Similar to Auxin efflux carrier protein. (t02)	C	C	C	C	C	C	C	T	C	C	T	T	T	T	T	T	T	T	T	T	T	T	T	T	T	T	T	T	T	T	T	T	T
Os01t0643450	t00	Rev	27593741	Rep:GGC(G)->AGC(S)	Hypothetical gene. (t00)	C	C	C	C	C	C	C	T	C	C	T	T	T	T	T	T	T	T	T	T	T	T	T	T	T	T	T	T	T	T	T	T	T
Os01t0644000	t01	For	27655857	5'UTR:-194(-271)	Twin-arginine translocation pathway signal domain containing protein. (t01)	N	G	G	G	G	G	G	A	G	G	A	A	A	A	A	A	A	A	A	A	A	A	A	A	A	A	A	A	A	A	A	A	A
Os01t0644200	t01	Rev	27661399	5'UTR:+12(-119)	Conserved hypothetical protein. (t01)	N	G	G	G	G	G	G	A	G	G	A	A	A	A	A	A	A	A	A	A	A	A	A	A	A	A	A	A	A	A	A	A	A
Os01t0645900	t01	Rev	27763418	Rep:AGC(S)->ACC(T)	Conserved hypothetical protein. (t01)	G	G	C	C	C	N	N	C	C	C	G	G	G	N	G	N	N	N	G	N	G	N	N	G	G	G	G	G	G	G	G	G	G
Os01t0646300	t01	Rev	27775578	5'UTR:-54(-178)	Similar to RGA2 protein. (t01)	C-G	C-G	C-G	C-G	C-G	C-G	C-G	C	C-G	C-G	C	C	C	C	C	C	C	C	C	C	C	C	C	C	C	C	C	C	C	C	C	C	C
Os01t0646800	t01	Rev	27796050	Rep:AAC(N)->GAC(D)	Conserved hypothetical protein. (t01)	N	T	T	T	T	N	N	C	T	T	C	C	C	C	C	C	C	C	C	C	C	C	C	C	C	C	C	C	C	C	C	C	C
Os01t0646800	t01	Rev	27801579	5'UTR:-160(-5386)	Conserved hypothetical protein. (t01)	N	G	G	G	G	G	G	A	G	G	A	A	A	A	A	A	A	A	A	A	A	A	A	A	A	A	A	A	A	A	A	A	A
Os01t0646800	t01	Rev	27801598	5'UTR:-179(-5405)	Conserved hypothetical protein. (t01)	T	C	C	C	C	C	C	T	C	C	T	T	T	T	T	T	T	T	T	T	T	T	T	T	T	T	T	T	T	T	T	T	T
Os01t0647200	t01	Rev	27817979	5'UTR:+39(-106)	Hypothetical conserved gene. (t01)	T+G	T+G	T+G	T+G	T+G	T+G	T+G	T	T+G	T+G	T	T	T	T	T	T	T	T	T	T	T	T	T	T	T	T	T	T	T	T	T	T	T
Os01t0647200	t02	Rev	27817979	5'UTR:+37(-106)	Hypothetical conserved gene. (t02)	T+G	T+G	T+G	T+G	T+G	T+G	T+G	T	T+G	T+G	T	T	T	T	T	T	T	T	T	T	T	T	T	T	T	T	T	T	T	T	T	T	T
Os01t0647200	t03	Rev	27817979	5'UTR:+37(-106)	Hypothetical conserved gene. (t03)	T+G	T+G	T+G	T+G	T+G	T+G	T+G	T	T+G	T+G	T	T	T	T	T	T	T	T	T	T	T	T	T	T	T	T	T	T	T	T	T	T	T
Os01t0648000	t01	Rev	27851971	Rep:AAG(K)->ACG(T)	Similar to AKT1-like potassium channel. (t01)	T	T	T	T	T	T	T	G	T	T	G	G	G	G	G	G	G	G	G	G	G	G	G	G	G	G	G	G	G	G	G	G	G
Os01t0649100	t01	For	27920284	5'UTR:-151(-281)	Malate dehydrogenase. (t01)	N	G	G	G	G	G	G	A	G	G	A	A	A	A	A	A	A	A	A	A	A	A	A	A	A	A	A	A	A	A	A	A	A
Os01t0650000	t01	For	27960710	Rep:GTC(V)->CTC(L)	Similar to esterase. (t01)	C	G	G	G	G	N	G	C	G	G	C	C	C	C	C	N	N	C	C	C	C	C	C	C	C	C	C	C	C	C	C	C	C
Os01t0651932	t00	For	28096666	Rep:GCG(A)->GAG(E)	Hypothetical conserved gene. (t00)	C	C	C	C	C	C	C	A	C	C	A	A	A	A	A	A	A	A	A	A	A	A	A	A	A	A	A	A	A	A	A	A	A
Os01t0652100	t02	Rev	28103901	5'UTR:-138(-184)	Protein of unknown function DUF231; plant domain containing protein. (t02)	A	A	A	A	A	A	A	G	A	A	G	G	G	G	G	G	G	G	G	G	G	G	G	G	G	G	G	G	G	G	G	G	G
Os01t0652300	t01	Rev	28113443	Rep:CAT(H)->CAG(Q)	Similar to Lipase-like protein. (t01)	C	A	A	A	A	A	A	C	A	A	C	C	C	C	C	C	C	C	C	C	C	C	C	C	C	C	C	C	C	C	C	C	C
Os01t0652700	t00	For	28127854	5'UTR:-41(-91)	Similar to predicted protein. (t00)	A	A+C	A+C	A+CC	A+C	A/A+C	A+C	A	A+C	A+C	A	A	A	A	A	A	A	A	A	A	A	A	A	A	A	A	A	A	A	A	A	A	A
aRep indicates variants fixed in OS that result in an amino acid replacement. 5'UTR indicates variants close to annotated transcription start sites (putative promoter regions). The numbers indicate the relative position from the transcription start site, and from the translation start site in brackets. Note that the nucleotides shown here are according to the orientation of transcription. Thus, f…
bThe Sample identifiers correspond to those in Figure 2B. Insertions are indicated as e.g. T+G, where G is inserted after the T. Deletions are indicated as e.g. C-AC, where AC after the C is deleted. If the indels are heterozygous, the variant of the other allele is shown after a slash.

## Sheet: S03chr02
Genes in low diversity regions that have variants fixed in O. sativa
Genes	Transcripts	Directions	Positions	Variationa	Products	Variantsb
						OM	1	2	3	4	5	6	7	8	9	10	11	12	13	14	15	16	17	18	19	20	21	22	23	24	25	26	27	28	29	30	31	32
Os02t0518800	t01	For	19686179	5'UTR:-81(-1128)	Conserved hypothetical protein. (t01)	N	N	T	T	N	T	T	T	T	T	C	C	C	C	C	C	C	C	C	C	C	C	C	C	C	C	C	C	C	C	C	C	C
Os02t0522700	t01	For	19887427	Rep:GGG(G)->GAG(E)	Hypothetical conserved gene. (t01)	G	G	G	G	G	G	G	G	G	G	R	A	A	A	A	A	A	A	A	A	A	A	A	A	A	A	A	A	A	A	A	A	A
Os02t0523300	t01	Rev	19921164	Rep:GGT(G)->GAT(D)	Spc97/Spc98 family protein. (t01)	N	C	C	T	C	C	C	C	C	C	T	T	T	T	T	T	T	T	T	T	T	T	T	T	T	T	T	T	T	T	T	T	T
Os02t0523500	t01	Rev	19926263	Rep:GTT(V)->ATT(I)	Similar to 110 kDa 4SNc-Tudor domain protein (Fragment). (t01)	A	A	A	A	A	A	A	A	A	A	C	C	C	C	C	C	C	C	C	C	C	C	C	C	C	C	C	C	C	C	C	C	C
Os02t0523500	t01	Rev	19932510	5'UTR:-51(-1005)	Similar to 110 kDa 4SNc-Tudor domain protein (Fragment). (t01)	C	C+CA	C+CA	C+CA	C+CA	C+CA	C+CA	C+CA	C+CA	C+CA	C	C	C	C	C	C	C	C	C	C	C	C	C	C	C	C	C	C	C	C	C	C	C
Os02t0523500	t02	Rev	19926263	Rep:GTT(V)->ATT(I)	Similar to RNA binding protein Rp120. (t02)	A	A	A	A	A	A	A	A	A	A	C	C	C	C	C	C	C	C	C	C	C	C	C	C	C	C	C	C	C	C	C	C	C
Os02t0524300	t00	For	19986606	Rep:AAG(K)->ATG(M)	Similar to predicted protein. (t00)	T	A	A	A	A	A	A	A	A	A	W	T	T	T	T	T	T	T	T	T	T	T	T	T	T	T	T	T	T	T	T	T	T
Os02t0525100	t01	Rev	20014233	5'UTR:-155(-311)	Conserved hypothetical protein. (t01)	N	A	G	G	G	N	G	N	G	G	A	A	A	A	A	A	A	A	A	A	A	A	A	A	A	A	A	A	A	A	N	A	A
Os02t0526650	t01	Rev	20097141	5'UTR:-193(-733)	Hypothetical gene. (t01)	N	A	A	A	A	N	A	N	A	A	G	G	G	G	G	G	G	G	G	G	G	G	G	G	G	G	G	G	G	G	G	G	G
Os02t0526700	t00	Rev	20099377	FrameShift	Conserved hypothetical protein. (t00)	C+GAG	C+GAG	C+GAG	C+GAG	C+GAG	N	C	C+GAG	C	C+GAG	C+GAG	C	C	N	C	C	N	N	C	N	N	N	C	C	C	C	C	C	C	N	C	C	C
Os02t0527200	t01	Rev	20131817	5'UTR:-199(-268)	Conserved hypothetical protein. (t01)	N	G	G	G	G	N	N	G	A	G	G	N	N	A	A	A	N	A	A	A	A	A	N	A	A	N	N	A	A	A	A	A	A
Os02t0527500	t00	For	20149983	5'UTR:-78(-78)	Similar to predicted protein. (t00)	N	C	C	C	C	N	N	C	C	C	C	N	T	N	N	N	N	N	T	T	N	N	T	T	T	N	T	T	T	T	T	T	T
Os02t0527700	t01	For	20160290	Rep:CGG(R)->TGG(W)	Conserved hypothetical protein. (t01)	N	C	C	C	C	C	N	N	C	C	T	T	T	T	T	T	T	N	T	T	T	T	T	T	T	T	N	T	T	T	T	T	T
Os02t0527900	t00	For	20168992	5'UTR:-174(-174)	Hypothetical conserved gene. (t00)	C	C	N	C	T	C	C	C	T	C	C	T	T	T	T	T	T	T	T	T	T	T	T	T	T	T	T	T	T	T	T	T	T
Os02t0527900	t00	For	20169954	Rep:GAC(D)->GAA(E)	Hypothetical conserved gene. (t00)	C	C	C	C	A	C	C	C	C	C	C	A	A	A	A	N	A	N	A	A	A	A	N	A	A	A	A	A	A	N	A	N	A
Os02t0527900	t00	For	20169955	Rep:ATC(I)->GTC(V)	Hypothetical conserved gene. (t00)	A	A	A	A	A	A	G	G	A	A	A	G	G	G	G	N	G	N	G	G	G	G	N	G	G	G	G	G	G	N	G	N	G
Os02t0530100	t01	Rev	20313349	5'UTR:-103(-284)	Heavy metal transport/detoxification protein domain containing protein. (t01)	N	A	A	N	A	N	G	A	A	A	G	G	G	G	G	G	G	G	G	G	G	G	G	G	G	G	G	G	G	G	G	G	G
Os02t0530600	t01	Rev	20337768	Rep:CGC(R)->CTC(L)	Poly(ADP-ribose) polymerase; regulatory region domain containing protein. (t01)	C	C	C	C	C	C	C	C	C	C	A	A	A	A	A	A	A	A	A	A	A	A	A	A	A	A	A	A	A	A	A	A	A
Os02t0530600	t02	Rev	20337768	Rep:CGC(R)->CTC(L)	Similar to Poly. (t02)	C	C	C	C	C	C	C	C	C	C	A	A	A	A	A	A	A	A	A	A	A	A	A	A	A	A	A	A	A	A	A	A	A
Os02t0535000	t01	Rev	20544863	5'UTR:-194(-258)	Conserved hypothetical protein. (t01)	N	C	C	C	C	C	C	N	C	G	C	G	G	G	G	G	G	G	G	G	G	G	N	G	G	G	G	G	G	G	G	G	G
aRep indicates variants fixed in OS that result in an amino acid replacement. 5'UTR indicates variants close to annotated transcription start sites (putative promoter regions). The numbers indicate the relative position from the transcription start site, and from the translation start site in brackets. Note that the nucleotides shown here are according to the orientation of transcription. Thus, f…
bThe Sample identifiers correspond to those in Figure 2B. Insertions are indicated as e.g. T+G, where G is inserted after the T. Deletions are indicated as e.g. C-AC, where AC after the C is deleted. If the indels are heterozygous, the variant of the other allele is shown after a slash.

## Sheet: S04chr03
Genes in low diversity regions that have variants fixed in O. sativa
Genes	Transcripts	Directions	Positions	Variationa	Products	Variantsb
						OM	1	2	3	4	5	6	7	8	9	10	11	12	13	14	15	16	17	18	19	20	21	22	23	24	25	26	27	28	29	30	31	32
Os03t0661800	t01	Rev	26799436	Rep:TCC(L)->AAA(I)	PDZ/DHR/GLGF domain containing protein.	N	G	G	G	G	G	T	G	G	G	T	T	T	T	T	T	T	T	T	T	T	T	T	T	T	T	T	T	T	T	T	T	T
Os03t0661800	t01	Rev	26799437	Rep:TCC(L)->AAA(I)	PDZ/DHR/GLGF domain containing protein.	N	G	G	G	G	G	G	G	G	G	T	T	T	T	T	T	T	T	T	T	T	T	T	T	T	T	T	T	T	T	T	T	T
Os03t0661800	t01	Rev	26799438	Rep:TCC(L)->AAA(I)	PDZ/DHR/GLGF domain containing protein.	N	A	A	A	A	A	A	A	A	A	T	T	T	T	T	T	T	T	T	T	T	T	T	T	T	T	T	T	T	T	T	T	T
Os03t0661800	t01	Rev	26801263	5'UTR:-47(-312)	PDZ/DHR/GLGF domain containing protein.	N	C	C	A	C	C	C	C	C	C	A	A	A	A	A	A	A	A	A	A	A	A	A	A	A	A	A	A	A	A	A	A	A
Os03t0661800	t01	Rev	26801335	5'UTR:-119(-384)	PDZ/DHR/GLGF domain containing protein.	N	C	C	C	T	C	C	C	C	C	T	T	T	T	T	T	T	T	T	T	T	T	T	T	T	T	T	T	T	T	T	T	T
Os03t0661900	t01	For	26805274	Rep:GGT(G)->GTT(V)	Peptidase; trypsin-like serine and cysteine domain containing protein.	N	G	G	G	G	G	G	G	G	G	T	T	T	T	T	T	T	T	T	T	T	T	T	T	T	T	T	T	T	T	T	T	T
Os03t0663100	t01	For	26831021	Rep:TCT(S)->ACT(T)	PDZ/DHR/GLGF domain containing protein.	T	T	T	T	T	T	T	T	T	T	A	A	A	A	A	A	A	A	A	A	A	A	A	A	A	A	A	A	A	A	A	A	A
Os03t0663100	t01	For	26831765	Rep:ACC(T)->GCC(A)	PDZ/DHR/GLGF domain containing protein.	M	A	A	A	A	A	A	A	A	A	G	G	G	G	G	G	G	G	G	G	G	G	G	G	G	G	G	G	G	G	G	G	G
Os03t0663100	t01	For	26829623	5'UTR:-166(-286)	PDZ/DHR/GLGF domain containing protein.	C	C	C	C	C	C	T	C	C	C	T	T	T	T	T	T	T	T	T	T	T	T	T	T	T	T	T	T	T	T	T	T	T
Os03t0663100	t01	For	26829765	5'UTR:-24(-144)	PDZ/DHR/GLGF domain containing protein.	T	T	T	T	T	T	G	T	T	T	G	G	G	G	G	G	G	G	G	G	G	G	G	G	G	G	G	G	G	G	G	G	G
Os03t0663400	t01	Rev	26844833	5'UTR:-57(-102)	Similar to Thaumatin-like protein. (t01)	C	C	C	C	C	C	C	C	C	C	G	G	G	G	G	G	G	G	G	G	G	G	G	G	G	G	G	G	G	G	G	G	G
Os03t0663400	t01	Rev	26844914	5'UTR:-138(-183)	Similar to Thaumatin-like protein. (t01)	A	A	A	A	A	A	A	A	A	A	C	C	C	C	C	C	C	C	C	C	C	C	C	C	C	C	C	C	C	C	C	C	C
Os03t0663400	t02	Rev	26844833	5'UTR:-57(-102)	Similar to Thaumatin-like protein. (t02)	C	C	C	C	C	C	C	C	C	C	G	G	G	G	G	G	G	G	G	G	G	G	G	G	G	G	G	G	G	G	G	G	G
Os03t0663400	t02	Rev	26844914	5'UTR:-138(-183)	Similar to Thaumatin-like protein. (t02)	A	A	A	A	A	A	A	A	A	A	C	C	C	C	C	C	C	C	C	C	C	C	C	C	C	C	C	C	C	C	C	C	C
Os03t0663400	t03	Rev	26844833	5'UTR:-61(-102)	Similar to Thaumatin-like protein. (t03)	C	C	C	C	C	C	C	C	C	C	G	G	G	G	G	G	G	G	G	G	G	G	G	G	G	G	G	G	G	G	G	G	G
Os03t0663400	t03	Rev	26844914	5'UTR:-142(-183)	Similar to Thaumatin-like protein. (t03)	A	A	A	A	A	A	A	A	A	A	C	C	C	C	C	C	C	C	C	C	C	C	C	C	C	C	C	C	C	C	C	C	C
Os03t0663800	t01	Rev	26883888	5'UTR:+16(-29)	Globulin 1 (Fragment).	N	T	T	T	T	T	T	T	Y	T	A	A	A	A	N	A	A	N	A	A	A	A	A	A	A	A	A	A	A	A	A	A	A
Os03t0663800	t01	Rev	26883901	5'UTR:+3(-42)	Globulin 1 (Fragment).	N	T	T	T	T	K	T	T	Y	Y	C	C	C	C	C	N	C	N	C	C	C	C	C	C	C	C	C	C	C	C	C	C	C
Os03t0663900	t00	Rev	26884976	Rep:CCC(P)->CGC(R)	Hypothetical conserved gene.	G	G	G	G	G	G	G	G	G	G	C	C	C	C	C	C	C	C	C	C	C	C	C	C	C	C	C	C	C	C	C	C	C
Os03t0664300	t00	For	26904778	5'UTR:-41(-41)	Hypothetical conserved gene.	N	C	C	C	C	C	C	C	C	C	A	A	A	A	A	A	A	A	A	A	A	A	A	A	A	A	A	A	A	A	A	A	A
Os03t0664400	t01	For	26907114	Rep:ATC(I)->GTC'(V)	Fibroin. (t01),	G	A	A	A	A	A	A	A	A	A	G	G	G	G	G	G	G	G	N	G	G	N	G	G	G	G	G	G	G	G	G	G	G
Os03t0664400	t02	For	26907114	Rep:ATC(I)->GTC'(V)	Expressed protein (With alternative splicing). (t02)	G	A	A	A	A	A	A	A	A	A	G	G	G	G	G	G	G	G	N	G	G	N	G	G	G	G	G	G	G	G	G	G	G
Os03t0664400	t02	For	26907625	Rep:ACG(T)->ATG(M)	Expressed protein (With alternative splicing). (t02)	C	C	C	C	C	C	C	C	C	C	T	T	T	T	T	T	T	T	T	T	T	T	T	T	T	N	T	T	N	T	T	T	T
Os03t0664600	t00	For	26926534	Rep:GGC(G)->CGC(R)	Hypothetical conserved gene.	G	G	G	G	G	G	C	G	G	G	C	C	C	C	C	C	C	C	N	C	C	C	C	C	C	C	C	C	C	C	C	C	C
Os03t0664650	t00	Rev	26926534	Rep:CCG(P)->GCG(A)	Hypothetical gene.	G	G	G	G	G	G	C	G	G	G	C	C	C	C	C	C	C	C	N	C	C	C	C	C	C	C	C	C	C	C	C	C	C
Os03t0664650	t00	Rev	26926898	5'UTR:+44(-181)	Hypothetical gene.	C	C	C	C	C	C	C	C	C	C	A	A	A	A	A	A	A	A	A	A	A	A	A	A	A	A	A	A	A	A	A	A	A
Os03t0664650	t00	Rev	26926968	5'UTR:-26(-251)	Hypothetical gene.	T	T	T	T	T	T	T	T	T	T	C	C	C	C	C	C	C	C	C	C	C	C	C	C	C	C	C	C	C	C	C	C	C
Os03t0664800	t01	For	26930909	5'UTR:-37(-45)	Acyl-CoA N-acyltransferase domain containing protein.	G	G	G	G	G	G	G	G	G	G	A	A	A	A	A	A	A	A	A	A	A	A	A	A	A	A	A	A	A	A	A	A	A
Os03t0665101	t00	For	26959416	Rep:GTG(V)->GCG(A)	Similar to GCN5-related N-acetyltransferase (GNAT) family protein.	T	T	T	T	T	T	T	N	T	T	C	C	C	C	C	C	C	C	C	C	C	C	C	C	C	N	C	C	C	C	C	C	C
Os03t0665101	t00	For	26959231	5'UTR:-94(-94)	Similar to GCN5-related N-acetyltransferase (GNAT) family protein.	N	G	G	G	G	G	G	N	G	G	A	A	A	A	A	A	A	A	A	A	A	A	A	A	A	A	A	A	A	A	A	A	A
Os03t0665800	t01	For	27004274	5'UTR:-172(-172)	Armadillo-type fold domain containing protein. (Os03t0665800-01)	N	A	A	A	N	A	A	A	A	A	G	G	G	G	G	G	G	G	G	G	G	G	G	G	G	G	G	G	G	G	G	G	G
Os03t0665950	t01	For	27011811	5'UTR:-103(-263)	Conserved hypothetical protein. (Os03t0665950-01)	N	C	C	C	C	C	C	C	C	C	T	T	T	T	T	T	T	T	T	T	T	T	T	T	T	T	T	T	T	T	T	T	T
Os03t0666100	t00	For	27016892	Rep:CCT(P)->CAT(H)	Guanine nucleotide-exchange protein GEP1.	C	C	C	C	C	C	C	C	C	C	A	A	A	A	A	A	A	A	A	A	A	A	A	A	A	A	A	A	A	A	A	A	A
Os03t0666100	t00	For	27013161	5'UTR:-82(-1753)	Guanine nucleotide-exchange protein GEP1.	C	C	C	C	C	C	C	C	C	C	T	T	T	T	T	T	T	T	T	T	T	T	T	T	T	T	T	T	T	T	T	T	T
Os03t0666200	t01	Rev	27022842	5'UTR:-200(-314)	Pleckstrin homology-type domain containing protein.	T	T	T	T	T	T	T	C	T	T	C	C	C	C	C	C	C	C	C	C	C	C	C	C	C	C	C	C	C	C	C	C	C
Os03t0666300	t00	For	27029096	Rep:GCG(A)->TCG(S)	Hypothetical conserved gene.	N	G	G	G	G	G	G	G	G	T	T	T	T	T	T	T	T	T	T	T	N	T	T	T	T	T	T	T	T	T	T	T	T
Os03t0666300	t00	For	27027661	5'UTR:-86(-249)	Hypothetical conserved gene.	C	T	T	T	C	T	T	T	T	T	C	C	C	C	C	C	C	C	C	C	C	C	C	C	C	C	C	C	C	C	C	C	C
Os03t0668300	t01	For	27151707	Rep:CTA(L)->CCA(P)	Conserved hypothetical protein. (t01)	T	T	T	T	T	T	T	T	T	T	C	C	C	C	C	C	C	C	C	C	C	C	C	C	C	C	C	C	C	C	C	C	C
Os03t0668300	t01	For	27152156	Rep:GAG(E)->AAG(K)	Conserved hypothetical protein. (t01)	A	G	G	A	G	G	G	G	G	G	A	A	A	A	A	A	A	A	A	A	A	A	A	A	A	A	A	A	A	A	A	A	A
Os03t0668300	t02	For	27151707	Rep:CTA(L)->CCA(P)	Hypothetical conserved gene. (t02)	T	T	T	T	T	T	T	T	T	T	C	C	C	C	C	C	C	C	C	C	C	C	C	C	C	C	C	C	C	C	C	C	C
Os03t0668300	t02	For	27152156	Rep:GAG(E)->AAG(K)	Hypothetical conserved gene. (t02)	A	G	G	A	G	G	G	G	G	G	A	A	A	A	A	A	A	A	A	A	A	A	A	A	A	A	A	A	A	A	A	A	A
Os03t0668400	t01	For	27156644	Rep:GAT(D)->TAT(Y)	Peptidase C12; ubiquitin carboxyl-terminal hydrolase 1 domain containing protein.	G	G	G	G	G	G	G	G	G	G	T	T	T	T	T	T	T	T	T	T	T	T	T	T	T	T	T	T	T	T	T	T	T
Os03t0670100	t01	Rev	27259856	5'UTR:-122(-202)	Similar to ATP-binding protein of ABC transporter.	T	C	C	T	C	N	C	C	C	C	N	T	T	T	T	N	T	T	T	N	N	N	N	T	T	T	N	T	T	T	T	T	T
Os03t0670200	t01	For	27259856	5'UTR:+16(-76)	Similar to YJR013Wp (Fragment). (t01)	T	C	C	T	C	N	C	C	C	C	N	T	T	T	T	N	T	T	T	N	N	N	N	T	T	T	N	T	T	T	T	T	T
aRep indicates variants fixed in OS that result in an amino acid replacement. 5'UTR indicates variants close to annotated transcription start sites (putative promoter regions). The numbers indicate the relative position from the transcription start site, and from the translation start site in brackets. Note that the nucleotides shown here are according to the orientation of transcription. Thus, f…
bThe Sample identifiers correspond to those in Figure 2B. Insertions are indicated as e.g. T+G, where G is inserted after the T. Deletions are indicated as e.g. C-AC, where AC after the C is deleted. If the indels are heterozygous, the variant of the other allele is shown after a slash.

## Sheet: S05chr04
Genes in low diversity regions that have variants fixed in O. sativa
Genes	Transcripts	Directions	Positions	Variationa	Products	Variantsb
						OM	1	2	3	4	5	6	7	8	9	10	11	12	13	14	15	16	17	18	19	20	21	22	23	24	25	26	27	28	29	30	31	32
Os04g0517300	t01	Rev	26358859	Rep:GTC(V)->ATC(I)	Protein of unknown function DUF647 family protein.	C	C	C	C	C	C	C	C	C	C	T	T	T	T	T	T	T	N	T	T	T	T	T	T	T	T	T	T	T	T	T	T	T
Os04g0517400	t01	For	26363481	Rep:GCC(A)->TCC(S)	Conserved hypothetical protein.	G	G	G	G	G	G	G	G	G	G	T	T	T	T	T	T	T	T	T	T	T	T	T	T	T	T	T	T	T	T	T	T	T
Os04g0517500	t01	For	26366916	5'UTR:-53(-98)	Similar to Phosphoenolpyruvate carboxylase kinase 4.	A	G	G	N	A	G	G	A	G	G	G	N	A	N	N	A	N	N	A	A	A	A	A	A	A	A	N	A	A	A	N	A	N
Os04g0518800	t01	For	26458422	5'UTR:-143(-262)	Similar to Lysine decarboxylase-like protein.	T	A	A	A	A	A	A	A	A	A	T	T	T	T	T	T	T	T	T	T	T	T	T	T	T	T	T	T	T	T	T	T	T
Os04g0518800	t01	For	26458529	5'UTR:-36(-155)	Similar to Lysine decarboxylase-like protein.	C	A	A	A	A	A	A	A	A	A	C	C	C	C	C	C	C	C	C	C	C	C	C	C	C	C	C	C	C	C	C	C	C
Os04g0519700	t01	For	26512333	5'UTR:-196(-239)	Similar to Auxin response factor 10.	A+CCTTT	A+CCTTT	A+CCTTT	A+CCTTT	A+CCTTT	A+CCTTT	A+CCTTT	A+CCTTT	A+CCTTT	A+CCTTT	A	A	A	A	A	A	A	A	A	A	A	A	A	A	A	A	A	A	A	A	A	A	A
Os04g0519700	t01	For	26513667	Rep:ATA(I)->CTA(L)	Similar to Auxin response factor 10.	A	C	A	A	A	A	A	A	A	A	C	C	C	C	C	C	C	C	C	C	C	C	C	C	C	C	C	C	C	C	C	C	C
Os04g0520700	t01	Rev	26574968	5'UTR:59(-164)	Protein of unknown function DUF584 family protein.	G	G	G	G	G	G	G	G	G	G	C	C	C	C	C	C	C	C	C	C	C	C	C	C	C	C	C	C	C	C	C	C	C
Os04g0520900	t01	For	26591260	Rep:CGC(R)->CAC(H)	Pentatricopeptide repeat domain containing protein. (t01)	G	G	G	G	G	G	G	G	G	G	A	A	A	A	A	A	A	A	A	A	A	A	A	A	A	A	A	A	A	A	A	A	A
Os04g0520900	t02	For	26591260	Rep:CGC(R)->CAC(H)	Similar to OSIGBa0131L05.6 protein. (t02)	G	G	G	G	G	G	G	G	G	G	A	A	A	A	A	A	A	A	A	A	A	A	A	A	A	A	A	A	A	A	A	A	A
Os04g0521100	t01	For	26598458	5'UTR:19(-38)	Major intrinsic protein family protein.	C	C	C	C	C	C	C	C	C	C	A	A	A	A	A	A	A	A	A	A	A	A	A	A	A	A	A	A	A	A	A	A	A
Os04g0521300	t01	For	26602798	5'UTR:-149(-231)	Hypothetical protein.	C	C+GATCAG	C+GATCAG	C+GATCAG	C+GATCAG	C+GATCAG	C+GATCAG	C+GATCAG	C+GATCAG	C+GATCAG	C	C	C	C	C	C	C	C	C	C	C	C	C	C	C	C	C	C	C	C	C	C	C
Os04g0521600	t01	For	26608970	Rep:TTT(F)->ATT(I)	Alcohol dehydrogenase; zinc-containing; conserved site domain containing protein.	N	T	T	T	T	T	T	T	T	T	A	A	A	A	A	A	A	A	A	A	A	A	A	A	A	A	A	A	A	A	A	A	A
Os04g0521800	t01	For	26613818	5'UTR:-92(-149)	Peptidase M20 family protein. (t01)	G	G-T	G-T	G-T	G-T	G-T	G-T	G-T	G-T	G-T	G	G	G	G	G	G	G	G	G	G	G	G	G	G	G	G	G	G	G	G	G	G	G
Os04g0521800	t01	For	26617138	Rep:GAG(E)->GGG(G)	Peptidase M20 family protein. (t01)	A	A	A	A	A	A	A	A	A	A	G	G	G	G	G	G	G	G	G	G	G	G	G	G	G	G	G	G	G	G	G	G	G
Os04g0521800	t02	For	26613818	5'UTR:-117(-149)	Similar to OSIGBa0131L05.10 protein. (t02)	G	G-T	G-T	G-T	G-T	G-T	G-T	G-T	G-T	G-T	G	G	G	G	G	G	G	G	G	G	G	G	G	G	G	G	G	G	G	G	G	G	G
Os04g0521900	t01	Rev	26618335	5'UTR:-146(-235)	Conserved hypothetical protein.	A	N	A	A	A	A	A	A	A	A	T	T	T	T	T	T	T	T	T	T	T	T	T	T	T	T	T	T	T	T	T	T	T
Os04g0522100	t00	For	26619488	5'UTR:-102(-102)	Similar to OSIGBa0131L05.12 protein.	C	C	C	C	C	C	C	C	C	C	T	T	T	T	T	T	T	T	T	T	T	T	T	T	T	T	T	T	T	T	T	T	T
Os04g0522800	t01	For	26658039	5'UTR:+29(-6680)	Photosystem II oxygen evolving complex protein PsbQ family protein.	T	T	T	T	T	T	T	T	T	T	C	C	C	C	C	C	C	C	C	C	C	C	C	C	C	C	C	C	C	C	C	C	C
Os04g0522800	t01	For	26658045	5'UTR:+35(-6674)	Photosystem II oxygen evolving complex protein PsbQ family protein.	C	C	C	C	C	C	C	C	C	C	T	T	T	T	T	T	T	T	T	T	T	T	T	T	T	T	T	T	T	T	T	T	T
Os04g0522800	t01	For	26665559	Rep:GCG(A)->ACG(T)	Photosystem II oxygen evolving complex protein PsbQ family protein.	G	G	G	G	G	G	G	G	G	G	A	A	A	A	A	A	A	A	A	A	A	A	A	A	A	A	A	A	A	A	A	A	A
Os04g0523100	t01	Rev	26672938	5'UTR:-59(-1301)	Homeodomain-like containing protein. (t01),	G	G	G	G	G	G	G	G	G	G	T	T	T	T	T	T	T	T	T	T	T	T	T	T	T	T	T	T	T	T	T	T	T
Os04g0523500	t00	For	26698223	5'UTR:-94(-94)	Hypothetical conserved gene.	A	A	A	A	A	A	A	A	A	A	G	G	G	G	G	G	G	G	G	G	G	G	G	G	G	G	G	G	G	G	G	G	G
Os04g0523500	t00	For	26699571	Rep:GGC(G)->AGC(S)	Hypothetical conserved gene.	G	G	G	G	G	G	G	G	G	G	A	A	A	A	A	A	A	A	A	A	A	A	A	A	A	A	A	A	A	A	A	A	A
Os04g0523500	t00	For	26699716	Rep:GAG(E)->AAG(K)	Hypothetical conserved gene.	G	G	G	G	G	G	G	G	G	G	A	A	A	A	A	A	A	A	A	A	A	A	A	A	A	A	A	A	A	A	A	A	A
Os04g0523600	t01	Rev	26705458	Rep:TAC(Y)->CAC(H)	UDP-glucuronosyl/UDP-glucosyltransferase family protein.	G	A	A	A	A	A	A	A	A	A	G	G	G	G	G	G	G	G	G	G	G	G	G	G	G	G	G	N	G	G	G	G	G
Os04g0523600	t01	Rev	26705479	Rep:AAC(N)->CAC(H)	UDP-glucuronosyl/UDP-glucosyltransferase family protein.	T	T	T	T	T	T	T	T	T	T	G	G	G	G	G	G	G	G	G	G	G	G	G	G	G	G	G	N	G	G	G	G	G
Os04g0523600	t01	Rev	26706067	Rep:GAC(D)->CAC(H)	UDP-glucuronosyl/UDP-glucosyltransferase family protein.	S	C	C	C	C	C	C	C	C	C	G	G	G	G	G	G	G	G	G	G	G	G	G	N	G	G	G	G	G	G	G	G	G
Os04g0523600	t01	Rev	26706324	Rep:GCC(A)->GTC(V)	UDP-glucuronosyl/UDP-glucosyltransferase family protein.	G	N	G	A	G	G	G	G	G	G	A	A	A	A	A	A	A	N	A	A	A	A	A	A	A	A	A	A	A	A	A	A	A
Os04g0523600	t01	Rev	26706504	Rep:CCG(P)->CTG(L)	UDP-glucuronosyl/UDP-glucosyltransferase family protein.	A	N	S	G	G	N	N	G	G	G	A	A	A	A	A	A	A	N	A	A	A	N	A	A	A	A	A	A	A	A	A	A	A
Os04g0523600	t01	Rev	26707015	5'UTR:-81(-117)	UDP-glucuronosyl/UDP-glucosyltransferase family protein.	T	G	G	G	G	G	G	G	T/T-ATA	G	T	T	T	T	T	T	T	T	T	T	T	T	T	T	T	T	T	T	T	T	T	T	T
Os04g0523600	t01	Rev	26707016	5'UTR:-82(-118)	UDP-glucuronosyl/UDP-glucosyltransferase family protein.	G	G	G	G	G	G	G	G	G	G	A	A	A	A	A	A	A	A	A	A	A	A	A	A	A	A	A	A	A	A	A	A	A
Os04g0523600	t01	Rev	26707020	5'UTR:-86(-122)	UDP-glucuronosyl/UDP-glucosyltransferase family protein.	A	A	A	A	A	G	A	A	R	A	G	G	G	G	G	G	G	G	G	G	G	G	G	G	G	G	G	G	G	G	G	G	G
Os04g0523600	t01	Rev	26707042	5'UTR:-108(-144)	UDP-glucuronosyl/UDP-glucosyltransferase family protein.	C	A	A	N	A	N	A	N	A	A	T	T	T	T	T	T	T	T	T	T	T	T	T	T	T	T	T	T	T	T	T	T	T
Os04g0523600	t01	Rev	26707054	5'UTR:-120(-156)	UDP-glucuronosyl/UDP-glucosyltransferase family protein.	T	G	G	T	G	N	G	G	G	G	T	T	T	T	T	T	T	T	T	T	T	T	T	T	T	T	T	T	T	T	T	T	T
Os04g0523600	t01	Rev	26707065	5'UTR:-131(-167)	UDP-glucuronosyl/UDP-glucosyltransferase family protein.	T-AA	T-AA	T-AA	T	T-AA	N	T-AA	T-AA	T-AA	T-AA	T	T	T	T	T	T	T	T	T	T	T	T	T	T	T	T	T	T	T	T	T	T	T
Os04g0523650	t01	For	26705369	5'UTR:-184(-232)	Conserved hypothetical protein.	C	C	C	C	C	C	C	C	C	C	A	A	A	A	A	A	A	A	A	A	A	A	A	A	A	A	A	A	A	A	A	A	A
Os04g0523650	t01	For	26705402	5'UTR:-151(-199)	Conserved hypothetical protein.	C	C	C	C	C	C	C	C	C	C	T	T	T	T	T	T	T	T	T	T	T	T	T	T	T	T	T	T	T	T	T	T	T
Os04g0523650	t01	For	26705458	5'UTR:-95(-143)	Conserved hypothetical protein.	G	A	A	A	A	A	A	A	A	A	G	G	G	G	G	G	G	G	G	G	G	G	G	G	G	G	G	N	G	G	G	G	G
Os04g0523650	t01	For	26705479	5'UTR:-74(-122)	Conserved hypothetical protein.	T	T	T	T	T	T	T	T	T	T	G	G	G	G	G	G	G	G	G	G	G	G	G	G	G	G	G	N	G	G	G	G	G
Os04g0523700	t00	Rev	26713156	Rep:CAA(Q)->CAC(H)	Similar to OSIGBa0153E02-OSIGBa0093I20.9 protein.	G	T	T	T	T	T	T	T	T	T	G	G	G	G	G	G	G	G	G	G	G	G	G	G	G	G	G	G	G	G	G	G	G
Os04g0523700	t00	Rev	26713160	Rep:GCT(A)->GTT(V)	Similar to OSIGBa0153E02-OSIGBa0093I20.9 protein.	G	G	G	G	G	G	G	G	G	G	A	A	A	A	A	A	A	A	A	A	A	A	A	A	A	A	A	A	A	A	A	A	A
Os04g0523700	t00	Rev	26713194	Rep:ATG(M)->CTG(L)	Similar to OSIGBa0153E02-OSIGBa0093I20.9 protein.	G	T	T	T	T	T	T	T	T	T	G	G	G	G	G	G	G	G	G	G	G	G	G	G	G	G	G	G	G	G	G	G	G
Os04g0523700	t00	Rev	26714253	Rep:TGC(C)->CGC(R)	Similar to OSIGBa0153E02-OSIGBa0093I20.9 protein.	G	A	A	A	A	N	N	A	A	A	G	G	G	N	G	G	G	G	G	G	G	N	G	G	G	G	G	G	G	G	G	G	G
Os04g0523700	t00	Rev	26714809	5'UTR:-136(-136)	Similar to OSIGBa0153E02-OSIGBa0093I20.9 protein.	N	T	T	T	T	T	T	T	T	T	G	G	G	G	G	G	G	G	G	G	G	G	G	G	G	G	G	G	G	G	G	G	G
Os04g0523900	t00	For	26717693	Rep:ACC(T)->GCC(A)	Hypothetical gene.	N	A	A	A	A	A	G	M	A	A	G	G	G	G	G	G	G	G	G	G	G	G	G	G	G	G	G	G	G	G	G	G	G
Os04g0523900	t00	For	26717822	Rep:CTC(L)->GTC(V)	Hypothetical gene.	N	C	C	C	C	C	G	C	C	C	G	G	G	G	G	G	G	G	G	G	G	G	N	G	G	G	G	G	G	G	G	G	G
Os04g0524500	t01	Rev	26736367	Del-AAG|AAG|GTG(KKV)->AAG|XXX|GTG(KXV)	Oligopeptide transporter OPT superfamily protein.	C+CTT	C+CTT	C+CTT	C+CTT	C+CTT	C+CTT	C+CTT	C+CTT	C+CTT	C+CTT	C	C	C	C	C	C	C	C	C	C	C	C	C	C	C	C	C	C	C	C	C	C	C
Os04g0524500	t01	Rev	26738124	Rep:GCC(A)->TCC(S)	Oligopeptide transporter OPT superfamily protein.	C	C	C	C	C	C	C	C	C	C	A	A	A	A	A	A	A	A	A	A	A	A	A	A	A	A	A	A	A	A	A	A	A
Os04g0524600	t01	For	26750196	Rep:GTC(V)->ATC(I)	Oligopeptide transporter OPT superfamily protein.	G	G	G	G	G	G	G	G	G	G	A	A	A	A	A	A	A	A	A	A	A	A	A	A	A	A	A	A	A	A	A	A	A
Os04g0525700	t01	Rev	26788114	Exon-Intron:GC->GT(|GTA|AAA|GC->|GTA|AAA|GT)	Conserved hypothetical protein.	N	G	G	G	G	G	A	G	G	G	A	A	A	A	A	N	A	A	A	A	N	A	N	A	A	A	A	A	A	A	A	A	A
aRep indicates variants fixed in OS that result in an amino acid replacement. 5'UTR indicates variants close to annotated transcription start sites (putative promoter regions). The numbers indicate the relative position from the transcription start site, and from the translation start site in brackets. Note that the nucleotides shown here are according to the orientation of transcription. Thus, f…
bThe Sample identifiers correspond to those in Figure 2B. Insertions are indicated as e.g. T+G, where G is inserted after the T. Deletions are indicated as e.g. C-AC, where AC after the C is deleted. If the indels are heterozygous, the variant of the other allele is shown after a slash.

## Sheet: S06chr04
Genes in low diversity regions that have variants fixed in O. sativa
Genes	Transcripts	Directions	Positions	Variationa	Products	Variantsb
						OM	1	2	3	4	5	6	7	8	9	10	11	12	13	14	15	16	17	18	19	20	21	22	23	24	25	26	27	28	29	30	31	32
Os04g0663300	t01	Rev	34355801	5'UTR:-116(-1564)	Similar to PHD finger-like domain protein 5A (Splicing factor 3B associated 14 kDa protein) (SF3b14b).	A	T	T	Y	T	T	T	T	A	T	A	A	A	A	N	A	N	N	A	A	A	A	A	A	A	A	A	A	A	A	A	A	A
Os04g0663500	t00	For	34355801	5'UTR:-113(-113)	Similar to OSIGBa0099L20.5 protein.	A	T	T	Y	T	T	T	T	A	T	A	A	A	A	N	A	N	N	A	A	A	A	A	A	A	A	A	A	A	A	A	A	A
Os04g0664400	t01	Rev	34393763	5'UTR:-180(-1365)	Auxin response factor 1. (t01),	T	T	T	T	T	T	T	T	T	T	C	C	C	C	C	C	C	C	C	C	C	C	C	C	C	C	C	C	C	C	C	C	C
Os04g0665400	t01	Rev	34464777	Rep:CAT(H)->TAT(Y)	Similar to H1005F08.7 protein. (t01),	T	T	T	T	T	T	T	T	T	T	C	C	C	C	C	C	C	C	C	C	C	C	C	C	C	C	C	C	C	C	C	C	C
Os04g0665400	t01	Rev	34466023	5'UTR:-130(-212)	Similar to H1005F08.7 protein. (t01),	G	G	G	G	G	G	G	G	G	G	A	A	A	A	A	A	A	A	A	A	A	A	A	A	A	A	A	A	A	A	A	A	A
Os04g0665400	t02	Rev	34464777	Rep:CAT(H)->TAT(Y)	Similar to H1005F08.7 protein. (t02)	T	T	T	T	T	T	T	T	T	T	C	C	C	C	C	C	C	C	C	C	C	C	C	C	C	C	C	C	C	C	C	C	C
Os04g0665400	t02	Rev	34466023	5'UTR:-136(-212)	Similar to H1005F08.7 protein. (t02)	G	G	G	G	G	G	G	G	G	G	A	A	A	A	A	A	A	A	A	A	A	A	A	A	A	A	A	A	A	A	A	A	A
Os04g0665500	t01	For	34467620	5'UTR:-175(-440)	Similar to BAF60b domain protein. (t01)	C+A	C+A	C+A	C+A	C+A	C+A	C+A	C+A	C+A	C+A	C	C	C	C	C	C	C	C	C	C	C	C	C	C	C	C	C	C	C	C	C	C	C
Os04g0665700	t01	For	34483358	Rep:TCG(S)->TTG(L)	K Homology; type 1; subgroup domain containing protein. (t01)	C	C	C	C	C	C	C	C	C	C	T	T	T	T	T	T	T	T	T	T	T	T	T	T	T	T	T	T	T	T	T	T	T
Os04g0665700	t01	For	34484833	Rep:CCA(P)->TCA(S)	K Homology; type 1; subgroup domain containing protein. (t01)	C	C	C	C	C	C	C	C	C	C	T	T	T	T	T	T	T	T	T	T	T	T	T	T	T	T	T	T	T	T	T	T	T
Os04g0665700	t01	For	34484923	Rep:GCG(A)->CCG(P)	K Homology; type 1; subgroup domain containing protein. (t01)	G	G	G	G	G	G	G	G	G	G	C	C	C	C	C	C	C	C	C	C	C	C	C	C	C	C	C	C	C	C	C	C	C
Os04g0665800	t01	For	34485463	5'UTR:-114(-198)	Conserved hypothetical protein. (t01)	C	C	C	C	C	C	C	C	C	C	T	T	T	T	T	T	T	T	T	T	T	T	T	T	T	T	T	T	T	T	T	T	T
Os04g0665800	t02	For	34485463	5'UTR:-147(-198)	Conserved hypothetical protein. (t02)	C	C	C	C	C	C	C	C	C	C	T	T	T	T	T	T	T	T	T	T	T	T	T	T	T	T	T	T	T	T	T	T	T
Os04g0665800	t03	For	34485463	5'UTR:-185(-198)	Similar to H1005F08.12 protein. (t03)	C	C	C	C	C	C	C	C	C	C	T	T	T	T	T	T	T	T	T	T	T	T	T	T	T	T	T	T	T	T	T	T	T
Os04g0666900	t01	Rev	34540875	Rep:GAT(D)->GTT(V)	Similar to H1005F08.22 protein. (t01)	T	T	T	T	T	T	T	T	T	T	A	A	A	A	A	A	A	A	A	A	A	A	A	A	A	A	A	A	A	A	A	A	A
Os04g0666900	t01	Rev	34543104	Rep:TAT(Y)->CAT(H)	Similar to H1005F08.22 protein. (t01)	G	A	A	A	A	A	A	A	A	A	G	G	G	G	G	G	G	G	G	G	G	G	G	G	G	G	G	G	G	G	G	G	G
Os04g0666900	t01	Rev	34543317	Rep:ATA(I)->GTA(V)	Similar to H1005F08.22 protein. (t01)	C	T	T	T	T	T	T	T	T	T	C	C	C	C	C	C	C	C	C	C	C	C	C	C	C	C	C	C	C	C	C	C	C
Os04g0666900	t02	Rev	34540875	Rep:GAT(D)->GTT(V)	Similar to H1005F08.22 protein. (t02)	T	T	T	T	T	T	T	T	T	T	A	A	A	A	A	A	A	A	A	A	A	A	A	A	A	A	A	A	A	A	A	A	A
Os04g0667000	t01	Rev	34557419	5'UTR:-84(-131)	Tafazzin family protein. (t01)	A	A	A	A	N	A	A	A	A	A	T	T	T	T	T	T	T	T	T	T	T	N	T	T	T	T	T	T	T	T	T	T	T
Os04g0667200	t01	For	34561141	Rep:CAC(H)->CAA(Q)	Similar to H1005F08.24 protein. (t01)	C	C	C	C	C	C	C	C	C	C	A	A	A	A	A	A	A	A	A	A	A	A	A	A	A	A	A	A	A	A	A	A	A
Os04g0667300	t01	For	34568180	Rep:ACG(T)->AAA(K)	Similar to Fe2+ dioxygenase-like. (t01)	N	C	C	C	C	S	C	C	C	C	A	A	A	A	A	A	A	A	A	A	A	A	A	A	A	A	A	A	A	A	A	A	A
Os04g0667300	t01	For	34568181	Rep:ACG(T)->AAA(K)	Similar to Fe2+ dioxygenase-like. (t01)	N	G	G	G	G	A	G	G	G	G	A	A	A	A	A	A	A	A	A	A	A	A	A	A	A	A	A	A	A	A	A	A	A
Os04g0667300	t01	For	34568209	FrameShift	Similar to Fe2+ dioxygenase-like. (t01)	T+TG	T+TG	T+TG	T+TG	T+TG	T+GG	T+TG	T+TG	T+TG	T+TG	T	T	T	T	T	T	T	T	T	T	T	T	T	T	T	T	T	T	T	T	T	T	T
Os04g0667400	t01	Rev	34569912	5'UTR:+74(-1419)	2OG-Fe(II) oxygenase domain containing protein. (t01)	G	G+A	G+A	G+AAA	G+A	G+AA	G	G+AAA	G+AA/G+AAA	G+A	G	G	G	G	G	G	G	G	G	G	G	G	G	G	G	G	G	G	G	G	G	G	G
Os04g0667400	t01	Rev	34570020	5'UTR:-34(-1527)	2OG-Fe(II) oxygenase domain containing protein. (t01)	N	A+AC	A+AC	A+AC	A+AC	A+AC	A+AC	A+AC	A+AC	A+AC	A	A	A	A	A	A	A	A	A	A	A	A	A	A	A	A	A	A	A	A	A	A	A
Os04g0667400	t01	Rev	34570089	5'UTR:-103(-1596)	2OG-Fe(II) oxygenase domain containing protein. (t01)	N	A	A	A	A	A	A	A	A	A	T	T	T	T	T	T	T	T	T	T	T	T	T	T	T	T	T	T	T	T	T	T	T
Os04g0667900	t01	For	34590676	5'UTR:-178(-237)	Regulatory protein RecX family protein. (t01)	N	G	G	G	G	G	G	G	G	G	A	A	A	A	A	A	A	A	A	A	A	A	A	A	A	A	A	A	A	A	A	A	A
Os04g0668000	t01	Rev	34594940	Rep:CGA(R)->CAA(Q)	Conserved hypothetical protein.	N	C	C	C	C	C	C	C	C	C	T	T	T	T	T	T	T	T	T	T	T	T	T	T	T	T	T	T	T	T	T	T	T
Os04g0668200	t01	Rev	34602559	5'UTR:-169(-997)	Conserved hypothetical protein.	C	C	C	C	C	C	C	C	C	C	T	T	T	T	T	T	T	T	T	T	T	T	T	T	T	T	T	T	T	T	T	T	T
Os04g0668200	t01	Rev	34602585	5'UTR:-195(-1023)	Conserved hypothetical protein.	G	G	G	G	G	G	G	G	G	G	A	A	A	A	A	A	A	A	A	A	A	A	A	A	A	A	A	A	A	A	A	A	A
Os04g0668300	t01	Rev	34603917	Rep:GCG(A)->ACG(T)	Conserved hypothetical protein.	C	C	C	C	C	C	T	C	C	C	T	T	T	T	T	T	T	T	T	T	T	T	T	T	T	T	T	T	T	T	T	T	T
Os04g0668350	t01	For	34605887	5'UTR::48(-105)	Hypothetical conserved gene.	G	G	G	G	G	G	G	G	G	G	A	A	A	A	A	A	A	A	A	A	A	A	A	A	A	A	A	A	A	A	A	A	A
Os04g0668400	t01	Rev	34606506	5'UTR:-156(-246)	Conserved hypothetical protein.	A	A	A	A	A	A	A	A	A	A	G	G	G	G	G	G	G	G	G	G	G	G	G	G	G	G	G	G	G	G	G	G	G
Os04g0668600	t01	For	34609351	5'UTR:-158(-319)	Kelch-type beta propeller domain containing protein.	N	G	G	G	G	G	G	G	G	G	A	A	A	A	A	A	A	A	A	A	A	A	A	A	A	A	A	A	A	A	A	A	A
Os04g0668600	t01	For	34609372	5'UTR:-137(-298)	Kelch-type beta propeller domain containing protein.	N	G	G	G	A	G	G	G	G	G	A	A	A	A	A	A	A	A	A	A	A	A	A	A	A	A	A	A	A	A	A	A	A
Os04g0668700	t01	Rev	34616033	5'UTR::55(-427)	Phosphatidylinositol 3- and 4-kinase; catalytic domain containing protein. (t01)	N	T+CTC	T+CTC	T+CTC	T+CTC	T+CTC	T	T+CTC	T+CTC	T+CTC	T	T	T	T	T	T	T	T	T	T	T	T	T	T	T	T	T	T	T	T	T	T	T
Os04g0668700	t01	Rev	34616123	5'UTR:-35(-517)	Phosphatidylinositol 3- and 4-kinase; catalytic domain containing protein. (t01)	T	A	M	A	A	A	A	A	A	A	T	T	T	T	T	T	T	T	T	T	T	T	T	T	T	T	T	T	T	T	T	T	T
Os04g0669100	t01	Rev	34630499	5'UTR:-176(-396)	Conserved hypothetical protein.	N	T	T	T	T	T	T	T	T	A	A	A	A	A	A	A	A	A	A	A	A	A	A	A	A	A	A	A	A	A	A	A	A
Os04g0669300	t01	For	34637310	5'UTR:-108(-221)	EF hand domain containing protein.	N	G	G	G	G	G	G	G	G	G	A	A	A	A	N	A	A	A	A	A	A	A	A	A	A	N	A	A	A	A	A	A	A
Os04g0669300	t01	For	34638544	Rep:AAG(K)->AAT(N)	EF hand domain containing protein.	G	G	G	G	G	G	G	G	G	G	T	T	T	T	T	T	T	T	T	T	T	T	T	T	T	T	T	T	T	T	T	T	T
Os04g0669700	t00	Rev	34654235	5'UTR:-122(-135)	Similar to H0818H01.9 protein.	N	T	T	T	K	T	K	T	Y	T	C	C	C	C	C	C	C	C	C	C	C	C	C	C	C	C	C	C	C	C	C	C	C
Os04g0669800	t01	Rev	34658018	5'UTR:-179(-280)	Methylthioribose kinase (EC 2.7.1.100).	N	T	T	T	T	T	T	T	T	T	G	G	G	G	G	G	G	G	G	G	G	G	G	G	G	G	G	G	G	G	G	G	G
Os04g0670000	t01	For	34665650	5'UTR:-30(-270)	Reticulon family protein.	N	A+TTTT	A+TTTT	A+TTTT	A+TTTT	A+TTTT	A+TTTT	A+TTTT	A+TTTT	A+TTTT	A	A	A	A	A	A	A	A	A	A	A	A	A	A	A	A	A	A	A	A	A	A	A
Os04g0670400	t01	Rev	34703758	Rep:ACG(T)->AAG(K)	Ovarian tumour; otubain domain containing protein. (t01)	G	G	G	G	G	G	G	G	G	G	T	T	T	T	T	T	T	T	T	T	T	T	T	T	T	T	T	T	T	T	T	T	T
Os04g0670400	t01	Rev	34704844	5'UTR:+28(-373)	Ovarian tumour; otubain domain containing protein. (t01)	A	A	A	A	A	A	A	A	A	A	T	T	T	T	T	T	T	T	T	T	T	T	T	T	T	T	T	T	T	T	T	T	T
Os04g0670400	t02	Rev	34703758	Rep:ACG(T)->AAG(K)	Similar to H0624F09.2 protein. (t02)	G	G	G	G	G	G	G	G	G	G	T	T	T	T	T	T	T	T	T	T	T	T	T	T	T	T	T	T	T	T	T	T	T
Os04g0670400	t02	Rev	34704844	5'UTR:+5(-101)	Similar to H0624F09.2 protein. (t02)	A	A	A	A	A	A	A	A	A	A	T	T	T	T	T	T	T	T	T	T	T	T	T	T	T	T	T	T	T	T	T	T	T
Os04g0670600	t01	Rev	34710897	Rep:GCT(A)->TCT(S)	Similar to H0624F09.5 protein. (t01)	C	C	C	C	C	C	C	C	C	M	A	A	A	A	A	A	A	A	A	A	A	A	A	A	A	A	A	A	A	A	A	A	A
Os04g0670600	t02	Rev	34710897	Rep:GCT(A)->TCT(S)	Exostosin-like family protein. (t02)	C	C	C	C	C	C	C	C	C	M	A	A	A	A	A	A	A	A	A	A	A	A	A	A	A	A	A	A	A	A	A	A	A
Os04g0670800	t01	For	34714882	5'UTR:-130(-278)	UBX domain containing protein. (t01)	T	C	C	C	C	C	C	C	C	C	T	T	T	T	T	T	T	T	T	T	T	T	T	T	T	T	T	T	T	T	T	T	T
Os04g0670800	t01	For	34714978	5'UTR:-34(-182)	UBX domain containing protein. (t01)	N	T-TA	T-TA	T-TA	T-TA	T-TA	T-TA	T-TA	T-TA	T-TA	T	T	T	T	T	T	T	T	T	T	T	T	T	T	T	T	T	T	T	T	T	T	T
Os04g0670900	t00	Rev	34732466	5'UTR:-55(-55)	Homeodomain-like containing protein. (Sh4)	C	G	C	C	C	N	C	C	C	C	G	G	G	N	G	G	G	G	G	G	G	G	G	G	G	G	G	G	G	G	G	G	G
Os04g0671200	t01	Rev	34742410	5'UTR:-133(-471)	Similar to H0624F09.9 protein. (t02)	N	G	N	T	G	G	G	G	G	G	T	T	T	T	T	T	T	T	T	T	T	T	T	T	T	T	T	T	T	T	T	T	T
Os04g0671300	t01	Rev	34744634	Rep:CGA(R)->CAA(Q)	Similar to Suppressor of presenilin 5 (P110b homolog). (t01)	C	C	C	C	C	C	C	C	C	C	T	T	T	T	T	T	T	T	T	T	T	T	T	T	T	T	T	T	T	T	T	T	T
Os04g0672700	t01	Rev	34836040	5'UTR:-184(-207)	Pentatricopeptide repeat domain containing protein. (t01)	C	T	T	T	T	T	T	C	T	T	C	C	C	C	C	C	C	C	C	C	C	C	C	C	C	C	C	C	C	C	C	C	C
Os04g0672700	t02	Rev	34836040	5'UTR:-187(-207)	Pentatricopeptide repeat domain containing protein. (t02)	C	T	T	T	T	T	T	C	T	T	C	C	C	C	C	C	C	C	C	C	C	C	C	C	C	C	C	C	C	C	C	C	C
Os04g0673000	t03	Rev	34851025	5'UTR:-77(-376)	Similar to H0322F07.7 protein. (t03)	T	C	C	C	C	C	T	T	C	C	C	N	T	T	T	N	T	N	T	T	N	T	T	T	T	T	T	N	T	T	T	T	T
Os04g0673700	t01	For	34892428	5'UTR:-19(-467)	Conserved hypothetical protein. (t01)	N	A+CT	A+CT	A+CT	A+CT	A+CT	A+CT	A+CT	A+CT	A+CT	A	A	A	A	A	A	A	A	A	A	A	A	A	A	A	A	A	A	A	A	A	A	A
Os04g0673700	t02	For	34892428	5'UTR:-25(-467)	Conserved hypothetical protein. (t02)	N	A+CT	A+CT	A+CT	A+CT	A+CT	A+CT	A+CT	A+CT	A+CT	A	A	A	A	A	A	A	A	A	A	A	A	A	A	A	A	A	A	A	A	A	A	A
aRep indicates variants fixed in OS that result in an amino acid replacement. 5'UTR indicates variants close to annotated transcription start sites (putative promoter regions). The numbers indicate the relative position from the transcription start site, and from the translation start site in brackets. Note that the nucleotides shown here are according to the orientation of transcription. Thus, f…
bThe Sample identifiers correspond to those in Figure 2B. Insertions are indicated as e.g. T+G, where G is inserted after the T. Deletions are indicated as e.g. C-AC, where AC after the C is deleted. If the indels are heterozygous, the variant of the other allele is shown after a slash.

## Sheet: S07chr05
Genes in low diversity regions that have variants fixed in O. sativa
Genes	Transcripts	Directions	Positions	Variationa	Products	Variantsb
						OM	1	2	3	4	5	6	7	8	9	10	11	12	13	14	15	16	17	18	19	20	21	22	23	24	25	26	27	28	29	30	31	32
Os05g0595300	t01	For	29772555	5'UTR:-130(-205)	Similar to CCT motif family protein. (t01)	A+CTC	A+CTC	A+CTC	A	A+CTC	A+CTC	A+CTC	A+CTC	A+CTC	A+CTC	A	A	A	A	A	A	A	A	A	A	A	A	A	A	A	A	A	A	A	A	A	A	A
Os05g0595300	t01	For	29774419	Rep:TTG(L)->TTT(F)	Similar to CCT motif family protein. (t01)	G	G	G	G	G	G	G	G	G	G	T	T	T	T	T	T	T	T	T	T	T	T	T	T	T	T	T	T	T	T	T	T	T
Os05g0595300	t02	For	29772555	5'UTR:-132(-205)	Similar to CONSTANS-like protein. (t02)	A+CTC	A+CTC	A+CTC	A	A+CTC	A+CTC	A+CTC	A+CTC	A+CTC	A+CTC	A	A	A	A	A	A	A	A	A	A	A	A	A	A	A	A	A	A	A	A	A	A	A
Os05g0595300	t02	For	29774419	Rep:TTG(L)->TTT(F)	Similar to CONSTANS-like protein. (t02)	G	G	G	G	G	G	G	G	G	G	T	T	T	T	T	T	T	T	T	T	T	T	T	T	T	T	T	T	T	T	T	T	T
Os05g0595400	t01	Rev	29779270	Rep:AGG(R)->AAG(K)	Similar to Nucleoside diphosphate kinase III (EC 2.7.4.6) (NDK III) (NDP kinase III) (NDPK III).	C	C	C	C	S	C	C	C	C	C	T	T	T	T	T	T	T	T	T	T	T	T	T	T	T	T	T	T	T	T	T	T	T
Os05g0595400	t01	Rev	29779677	5'UTR:-156(-370)	Similar to Nucleoside diphosphate kinase III (EC 2.7.4.6) (NDK III) (NDP kinase III) (NDPK III).	T	T	T	T	T	T	T	T	T	T	C	C	C	C	C	C	C	C	C	C	C	C	C	C	C	C	C	C	C	C	C	C	C
Os05g0595450	t00	For	29776596	5'UTR:-172(-389)	Hypothetical gene.	C+AA	C+AA	C+AA	C+AA	C+AA	C+AA	C+AA	C+AA	C+AA	C+AA	C	C	C	C	C	C	C	C	C	C	C	C	C	C	C	C	C	C	C	C	C	C	C
Os05g0595800	t00	Rev	29795326	Rep:ACC(T)->AAC(N)	Protein kinase-like domain containing protein.	C	C	C	C	C	C	C	C	C	C	A	A	A	A	A	A	A	A	A	A	A	A	A	A	A	A	A	A	A	A	A	A	A
Os05g0595800	t00	Rev	29797587	Rep:GTC(V)->ATC(I)	Protein kinase-like domain containing protein.	C	T	C	C	C	C	C	C	C	C	T	T	T	T	T	T	N	T	T	T	T	T	T	T	T	T	T	T	T	T	T	T	T
Os05g0596000	t01	For	29804269	5'UTR:-185(-304)	Peptidase A1 domain containing protein. (t01)	A	A	A	M	A	A	A	A	A	A	G	G	G	G	G	G	G	G	G	G	G	G	G	G	G	G	G	G	G	G	G	G	G
Os05g0596000	t02	For	29804269	5'UTR:-188(-304)	Peptidase A1 domain containing protein. (t02)	A	A	A	M	A	A	A	A	A	A	G	G	G	G	G	G	G	G	G	G	G	G	G	G	G	G	G	G	G	G	G	G	G
Os05g0596200	t01	Rev	29810721	5'UTR:-95(-300)	Conserved hypothetical protein. (t01)	N	C	C	C	C	C	C	C	C	C	T	T	T	T	T	T	T	T	T	T	T	T	T	T	T	T	T	T	T	T	T	T	T
Os05g0596200	t01	Rev	29810737	5'UTR:-111(-316)	Conserved hypothetical protein. (t01)	N	G	G	G	G	G	G	G	G	G	A	A	A	A	A	A	A	A	A	A	A	A	A	A	A	A	A	A	A	A	A	A	A
Os05g0596200	t02	Rev	29810721	5'UTR:-109(-300)	Similar to predicted protein. (t02)	N	C	C	C	C	C	C	C	C	C	T	T	T	T	T	T	T	T	T	T	T	T	T	T	T	T	T	T	T	T	T	T	T
Os05g0596200	t02	Rev	29810737	5'UTR:-125(-316)	Similar to predicted protein. (t02)	N	G	G	G	G	G	G	G	G	G	A	A	A	A	A	A	A	A	A	A	A	A	A	A	A	A	A	A	A	A	A	A	A
Os05g0596200	t03	Rev	29810721	5'UTR:-118(-300)	Conserved hypothetical protein. (t03)	N	C	C	C	C	C	C	C	C	C	T	T	T	T	T	T	T	T	T	T	T	T	T	T	T	T	T	T	T	T	T	T	T
Os05g0596200	t03	Rev	29810737	5'UTR:-134(-316)	Conserved hypothetical protein. (t03)	N	G	G	G	G	G	G	G	G	G	A	A	A	A	A	A	A	A	A	A	A	A	A	A	A	A	A	A	A	A	A	A	A
Os05g0596500	t01	For	29834246	5'UTR:+32(-36)	Similar to RING-H2 finger protein ATL3I (YGHL1-C3HC4 RING fusion protein).	G+A	G+AGA	G+AGA	G+AGA	G+AGA	G+AGA	G+AGA	G	G+AGA	G+AGA	G	G	G	G	G	G	G	G	G	G	G	G	G	G	G	G	G	G	G	G	G	G	G
Os05g0596600	t02	Rev	29847050	Rep:GGA(G)->ATA(I)	Similar to SMC5 protein. (t02)	C	C	C	C	C	C	C	C	C	C	A	A	A	A	A	A	A	A	A	A	A	A	A	A	A	A	A	A	A	A	A	A	A
Os05g0596600	t02	Rev	29847051	Rep:GGA(G)->ATA(I)	Similar to SMC5 protein. (t02)	C	C	C	C	C	C	C	C	C	C	T	T	T	T	T	T	T	T	T	T	T	T	T	T	T	T	T	T	T	T	T	T	T
Os05g0597000	t00	For	29866512	Rep:CAT(H)->AAT(N)	Similar to DNA binding protein.	N	A	C	C	C	C	C	C	C	C	A	A	A	A	A	A	A	A	A	A	A	A	A	A	A	A	A	N	A	A	A	A	A
Os05g0597200	t01	Rev	29876623	Rep:GTG(V)->GCG(A)	Similar to AT1 protein.	N	A	A	A	M	A	A	A	A	G	G	G	G	G	G	G	G	N	G	G	G	G	G	G	G	G	G	G	G	G	G	G	G
aRep indicates variants fixed in OS that result in an amino acid replacement. 5'UTR indicates variants close to annotated transcription start sites (putative promoter regions). The numbers indicate the relative position from the transcription start site, and from the translation start site in brackets. Note that the nucleotides shown here are according to the orientation of transcription. Thus, f…
bThe Sample identifiers correspond to those in Figure 2B. Insertions are indicated as e.g. T+G, where G is inserted after the T. Deletions are indicated as e.g. C-AC, where AC after the C is deleted. If the indels are heterozygous, the variant of the other allele is shown after a slash.

## Sheet: S08chr07
Genes in low diversity regions that have variants fixed in O. sativa
Genes	Transcripts	Directions	Positions	Variationa	Products	Variantsb
						OM	1	2	3	4	5	6	7	8	9	10	11	12	13	14	15	16	17	18	19	20	21	22	23	24	25	26	27	28	29	30	31	32
Os07g0151900	t01	Rev	2762265	5'UTR:29(-52)	Hypothetical conserved gene.	N	N	N	N	N	G	G	G	G	G	T	T	T	T	T	T	T	T	T	T	T	T	T	T	T	T	T	T	T	T	T	T	T
Os07g0151900	t01	Rev	2762325	5'UTR:-31(-112)	Hypothetical conserved gene.	N	N	N	N	N	G+T	G+T	G+TTT	G+T	G+T	G	G	G	G	G	G	G	G	G	G	G	G	G	G	G	G	G	G	G	G	G	G	G
Os07g0151900	t01	Rev	2762411	5'UTR:-117(-198)	Hypothetical conserved gene.	N	N	N	N	N	T+G	T+G	T+G	T+G	T+G	T	T	T	T	T	T	T	T	T	T	T	T	T	T	T	T	T	T	T	T	T	T	T
Os07g0152000	t00	For	2783983	Rep:CAC(H)->AAC(N)	Transcription factor; TCP domain containing protein.	N	N	N	N	N	C	C	C	C	C	A	A	A	A	A	A	N	N	A	N	A	A	N	A	A	A	N	N	A	N	A	A	A
Os07g0152101	t01	For	2789451	5'UTR:80(-3133)	Hypothetical gene.	A	A	A	A	A	A	A	A	A	A	G	G	G	G	G	G	G	G	G	G	G	G	G	G	G	G	G	G	G	G	G	G	G
Os07g0152200	t01	Rev	2792336	Rep:CAG(Q)->CGG(R)	Similar to predicted protein.	Y	T	T	T	T	T	T	T	T	T	C	C	C	C	C	C	C	C	C	C	C	C	C	C	C	C	C	C	C	C	C	C	C
Os07g0152700	t00	For	2823593	Rep:GGG(G)->AGG(R)	Similar to Glutathione transferase.	N	G	G	G	G	G	G	G	A	G	A	N	A	A	A	A	A	A	A	A	A	A	A	A	A	A	A	A	A	A	A	A	A
Os07g0152900	t02	For	2829989	5'UTR:-104(-486)	Similar to Glycolate oxidase. (t02)	T	T	T	T	T	T	T	T	T	T	A	A	A	A	A	A	A	A	A	A	A	A	A	A	A	A	A	A	A	A	A	A	A
Os07g0152900	t02	For	2830077	5'UTR:-16(-398)	Similar to Glycolate oxidase. (t02)	C	C	C	C	C	C	C	C	C	C	T	T	T	T	T	T	T	T	T	T	T	T	T	T	T	T	T	N	T	T	T	T	T
Os07g0152900	t03	For	2829989	5'UTR:-111(-486)	Similar to Glycolate oxidase (EC 1.1.3.15) (Fragment). (t03)	T	T	T	T	T	T	T	T	T	T	A	A	A	A	A	A	A	A	A	A	A	A	A	A	A	A	A	A	A	A	A	A	A
Os07g0152900	t03	For	2830077	5'UTR:-23(-398)	Similar to Glycolate oxidase (EC 1.1.3.15) (Fragment). (t03)	C	C	C	C	C	C	C	C	C	C	T	T	T	T	T	T	T	T	T	T	T	T	T	T	T	T	T	N	T	T	T	T	T
Os07g0152950	t00	Rev	2833344	5'UTR:-154(-373)	Hypothetical gene.	A	A	A	A	A	A	A	A	A	A	G	G	G	G	G	G	G	G	G	G	G	G	G	G	G	G	G	G	G	G	G	G	G
Os07g0152950	t00	Rev	2833384	5'UTR:-194(-413)	Hypothetical gene.	T	G	G	G	G	G	G	G	G	G	T	T	T	T	T	T	T	T	T	T	T	T	T	T	T	T	T	T	T	T	T	T	T
Os07g0153000	t00	Rev	2836021	5'UTR:-47(-47)	Hypothetical conserved gene.	A	R	K	G	G	G	G	G	G	G	A	A	A	A	A	A	A	N	A	A	A	A	A	A	A	A	A	A	A	A	A	A	A
Os07g0153600	t00	Rev	2872229	5'UTR:12(-98)	Prostrate growth 1 (Prog1).	T	T	T	T	T	T	T	T	N	T	C	C	C	C	C	C	C	C	C	C	C	C	C	C	C	C	C	C	C	C	C	C	C
Os07g0154201	t00	Rev	2904698	5'UTR:-5(-959)	Hypothetical gene.	A	A+AGCTT	A+AGCTT	A+AGCTT	A+AGCTT	A+AGCTT	A+AGCTT	A+AGCTT	A+AGCTT	A+AGCTT	A	A	A	A	A	A	A	A	A	A	A	A	A	A	A	A	A	A	A	A	A	A	A
Os07g0154201	t00	Rev	2904719	5'UTR:-26(-980)	Hypothetical gene.	G	C	C	C	C	C	C	C	C	C	G	G	G	G	G	G	G	G	G	G	G	G	G	G	G	G	G	G	G	G	G	G	G
Os07g0154400	t01	Rev	2918353	Rep:CTA(L)->GTA(V)	Hypothetical conserved gene.	G	G	G	G	G	G	G	G	G	G	C	C	C	C	C	C	C	C	C	C	C	C	C	C	C	C	C	C	C	C	C	C	C
Os07g0154400	t01	Rev	2918413	Rep:ACT(T)->GCT(A)	Hypothetical conserved gene.	C	T	T	T	T	T	T	T	T	T	C	C	C	C	C	C	C	C	C	C	C	C	C	C	C	C	C	C	C	C	C	C	C
Os07g0154400	t01	Rev	2918427	Rep:GTG(V)->GGG(G)	Hypothetical conserved gene.	C	A	A	A	A	A	A	A	A	A	C	C	C	C	C	C	C	C	C	C	C	C	C	C	C	C	C	C	C	C	C	C	C
Os07g0154400	t01	Rev	2918918	Rep:ATG(M)->ACG(T)	Hypothetical conserved gene.	G	A	A	A	A	A	A	A	A	A	G	G	G	G	G	G	G	G	G	G	G	G	G	G	G	G	G	G	G	G	G	G	G
Os07g0154400	t01	Rev	2919016	Rep:TCC(S)->CCT(P)	Hypothetical conserved gene.	A	G	G	G	G	G	G	G	G	G	A	A	A	A	A	A	A	A	A	A	A	A	A	A	A	A	A	A	A	A	A	A	A
Os07g0154400	t01	Rev	2919018	Rep:TCC(S)->CCT(P)	Hypothetical conserved gene.	G	A	A	A	A	A	A	A	A	A	G	G	G	G	G	G	G	G	G	G	G	G	G	G	G	G	G	G	G	G	G	G	G
Os07g0154400	t01	Rev	2919031	Rep:GAT(D)->GAG(E)	Hypothetical conserved gene.	C	A	A	A	A	A	A	A	A	A	C	C	C	C	C	C	C	C	C	C	C	C	C	C	C	C	C	C	C	C	C	C	C
Os07g0154400	t01	Rev	2919041	Rep:ACT(T)->AAT(N)	Hypothetical conserved gene.	T	G	G	G	G	G	G	G	G	G	T	T	T	T	T	T	T	T	T	T	T	T	T	T	T	T	T	T	T	T	T	T	T
Os07g0154400	t01	Rev	2919053	Rep:TTA(L)->TCA(S)	Hypothetical conserved gene.	G	A	A	A	R	A	A	A	A	A	G	G	G	G	G	G	G	G	G	G	G	G	G	G	G	G	G	G	G	G	G	G	G
Os07g0154400	t01	Rev	2919676	Rep:GAT(D)->AAT(N)	Hypothetical conserved gene.	C	C	C	C	C	C	C	C	C	C	T	T	T	T	T	T	T	T	T	T	T	T	T	T	T	T	T	T	T	T	T	T	T
Os07g0154400	t01	Rev	2920695	Rep:TCT(S)->TTT(F)	Hypothetical conserved gene.	G	G	G	G	G	G	G	G	G	G	R	A	A	A	A	A	A	A	A	A	A	A	A	A	A	A	A	A	A	A	A	A	A
Os07g0154400	t01	Rev	2923822	Rep:GGT(G)->AGT(S)	Hypothetical conserved gene.	T	C	C	C	C	C	C	C	C	C	T	T	T	T	T	T	T	T	T	T	T	T	T	T	T	T	T	T	T	T	T	T	T
Os07g0154400	t01	Rev	2923840	Rep:GAG(E)->AAG(K)	Hypothetical conserved gene.	C	C	C	C	C	C	C	C	C	C	T	T	T	T	T	T	T	T	T	T	T	T	T	T	T	T	T	T	T	T	T	T	T
Os07g0154400	t01	Rev	2924181	Rep:GTA(V)->ATA(I)	Hypothetical conserved gene.	T	C	C	C	T+C	C	C	C	C	C	T	T	T	T	T	T	T	T	T	T	T	T	T	T	T	T	T	T	T	T	T	T	T
Os07g0154800	t01	Rev	2974658	Rep:GCT(A)->ACT(T)	Conserved hypothetical protein.	N	C	C	C	C	C	N	C	C	C	T	T	T	T	T	N	T	T	T	T	T	T	T	T	T	T	T	T	T	T	T	T	T
Os07g0154800	t01	Rev	2975136	5'UTR:-180(-373)	Conserved hypothetical protein.	T	C	C	C	T	C	C	C	C	C	T	T	T	T	T	T	T	T	T	T	T	T	T	T	T	T	T	T	T	T	T	T	T
Os07g0154800	t01	Rev	2975186	5'UTR:-230(-423)	Conserved hypothetical protein.	A	G	G	G	G	G	G	G	A	G	A	A	A	A	A	A	A	A	A	A	A	A	A	A	A	A	A	A	A	A	A	A	A
Os07g0154900	t01	For	2975347	5'UTR:-144(-221)	Conserved hypothetical protein.	C	C	C	C	C	C	C	C	C	C	T	T	T	T	T	T	T	T	T	T	T	T	T	T	T	T	T	T	T	T	T	T	T
Os07g0157700	t01	Rev	3138959	Rep:CCC(P)->CGC(R)	Conserved hypothetical protein.	N	G	G	G	G	G	G	G	G	G	C	C	C	C	C	C	C	C	C	C	C	C	C	C	C	C	C	C	C	C	C	C	C
Os07g0157700	t01	Rev	3141596	5'UTR:+46(-2600)	Conserved hypothetical protein.	N	A	C	C	C	C	C	C	C	C	A	A	A	A	A	N	A	A	A	A	A	A	A	A	A	A	A	A	A	A	A	A	A
Os07g0157700	t01	Rev	3141793	5'UTR:-151(-2797)	Conserved hypothetical protein.	N	T	T	T	T	T	T	T	T	T	C	C	C	C	C	C	C	C	C	C	C	C	C	C	C	C	C	C	C	C	C	C	C
Os07g0157700	t01	Rev	3141816	5'UTR:-174(-2820)	Conserved hypothetical protein.	N	A	A	A	A	A	A	A	A	A	G	G	G	G	G	G	G	G	G	G	G	G	G	G	G	G	G	G	G	G	G	G	G
Os07g0158000	t00	For	3147544	5'UTR:-65(-65)	Hypothetical conserved gene.	Y	C	C	C	C	C	C	C	C	M	C	T	T	T	T	T	T	T	T	T	T	T	T	T	T	T	T	T	T	T	T	T	T
Os07g0158000	t00	For	3147587	5'UTR:-22(-22)	Hypothetical conserved gene.	G	G	G	G	G	G	G	G	G	G	G	A	A	A	A	A	A	A	A	A	A	A	A	A	A	A	A	A	A	A	A	A	A
Os07g0158100	t01	Rev	3147544	Rep:GAG(G)->AAG(S)	Hypothetical gene.	Y	C	C	C	C	C	C	C	C	M	C	T	T	T	T	T	T	T	T	T	T	T	T	T	T	T	T	T	T	T	T	T	T
Os07g0158200	t01	For	3151027	5'UTR:+56(-32)	Deoxyribonuclease; TatD Mg-dependent domain containing protein.	C	C	A	A	C	T	C	C	C	C	C	T	T	T	T	N	T	T	T	T	T	T	T	T	T	T	T	T	T	T	T	T	T
Os07g0158200	t01	For	3154482	Rep:GGC(S)->AGC(F)	Deoxyribonuclease; TatD Mg-dependent domain containing protein.	N	C	C	C	C	C	C	C	C	C	C	T	T	T	T	T	T	T	T	T	T	T	T	T	T	T	T	T	T	T	T	T	T
Os07g0158300	t02	Rev	3156775	5'UTR:-33(-70)	RNA binding protein. (t02)	N	G	G	G	G	G	G	G	G	G	R	A	A	A	A	A	A	A	A	A	A	A	A	A	A	A	A	A	A	A	A	A	A
Os07g0158300	t02	Rev	3156809	5'UTR:-67(-104)	RNA binding protein. (t02)	N	G	G	G	G	G	G	G	G	G	K	T	T	T	T	T	T	T	T	T	T	T	T	T	T	T	T	T	T	T	T	T	T
Os07g0158300	t03	Rev	3156775	5'UTR:-34(-70)	RNA binding protein. (t03)	N	G	G	G	G	G	G	G	G	G	R	A	A	A	A	A	A	A	A	A	A	A	A	A	A	A	A	A	A	A	A	A	A
Os07g0158300	t03	Rev	3156809	5'UTR:-68(-104)	RNA binding protein. (t03)	N	G	G	G	G	G	G	G	G	G	K	T	T	T	T	T	T	T	T	T	T	T	T	T	T	T	T	T	T	T	T	T	T
Os07g0159800	t01	For	3230888	5'UTR:-107(-137)	MD-2-related lipid-recognition domain containing protein. (t01)	T	T	T	T	T	T	T	T	T	T	T	C	C	C	C	C	C	C	C	C	C	C	C	C	C	C	C	C	C	C	C	C	C
Os07g0159900	t01	For	3235254	5'UTR:+34(-84)	Thioredoxin fold domain containing protein. (Os07t0159900-01)	N	C+TCT	C+TCT	C+TCT	C+TCT	C+TCT	C+TCT	C+TCT	C+TCT	C+TCT	C+TCT	C	C	C	C	C	C	C	C	C	C	C	C	C	C	C	C	C	C	C	C	C	C
Os07g0160000	t00	For	3244480	Rep:GTT(V)->ATT(I)	Similar to Ubiquitin carboxyl-terminal hydrolase. (Os07t0160000-00)	G	G	G	G	G	G	G	G	G	G	G	A	A	A	A	A	A	A	A	A	A	A	A	A	A	A	A	A	A	A	A	A	A
Os07g0160100	t01	For	3251923	5'UTR:-152(-2136)	Similar to cDNA clone:J023038F18; full insert sequence. (t01)	C	C	C	C	C	C	C	C	C	C	C	A	A	A	A	A	A	A	A	A	A	A	A	A	A	A	A	A	A	A	A	A	A
Os07g0160100	t01	For	3252136	5'UTR:+61(-1923)	Similar to cDNA clone:J023038F18; full insert sequence. (t01)	N	C	C	C	C	M	C	C	A	A	M	T	T	T	T	T	T	T	T	T	T	T	T	T	T	T	T	T	T	T	T	T	T
Os07g0160100	t02	For	3253904	5'UTR:-24(-155)	YABBY protein (OsYAB1) (Filamentous flower protein 1). (t02)	G	G	G	G	G	G	G	G	G	G	G	T	T	T	T	T	T	T	T	T	T	T	T	T	T	T	T	T	T	T	T	T	T
Os07g0160100	t02	For	3254006	5'UTR:+78(-53)	YABBY protein (OsYAB1) (Filamentous flower protein 1). (t02)	A	G	G	G	G	G	G	G	G	G	G	A	A	A	A	A	A	A	A	A	A	A	A	A	A	A	A	N	A	A	A	A	A
Os07g0160100	t03	For	3253904	5'UTR:-25(-155)	Similar to cDNA clone:J023038F18; full insert sequence. (t03)	G	G	G	G	G	G	G	G	G	G	G	T	T	T	T	T	T	T	T	T	T	T	T	T	T	T	T	T	T	T	T	T	T
Os07g0160100	t03	For	3254006	5'UTR:+77(-53)	Similar to cDNA clone:J023038F18; full insert sequence. (t03)	A	G	G	G	G	G	G	G	G	G	G	A	A	A	A	A	A	A	A	A	A	A	A	A	A	A	A	N	A	A	A	A	A
Os07g0160400	t01	Rev	3279533	5'UTR:-73(-130)	Glyoxalase/bleomycin resistance protein/dioxygenase domain containing protein.	T-C	T-CC	T-CC	T-CC	T-CC	T-C	T-C	N	T-C	T-C	T	T	T	T	T	T	T	T	T	T	T	T	T	T	T	T	T	T	T	T	T	T	T
Os07g0160500	t01	For	3284426	5'UTR:-112(-2392)	Conserved hypothetical protein.	C	C	C	C	C	C	C	N	C	C	M	A	A	A	A	A	A	A	A	A	A	A	A	A	A	A	A	A	A	A	A	A	A
Os07g0160500	t01	For	3284441	5'UTR:-97(-2377)	Conserved hypothetical protein.	T	T	T	T	T	T	T	N	T	T	Y	C	C	C	C	C	C	C	C	C	C	C	C	C	C	C	C	C	C	C	C	C	C
Os07g0162450	t01	For	3372618	Rep:GAT(D)->AAT(N)	Conserved hypothetical protein.	R	G	G	G	G	G	G	G	G	G	A	A	N	A	A	A	A	A	N	A	A	A	A	A	A	A	A	A	A	A	A	A	A
aRep indicates variants fixed in OS that result in an amino acid replacement. 5'UTR indicates variants close to annotated transcription start sites (putative promoter regions). The numbers indicate the relative position from the transcription start site, and from the translation start site in brackets. Note that the nucleotides shown here are according to the orientation of transcription. Thus, f…
bThe Sample identifiers correspond to those in Figure 2B. Insertions are indicated as e.g. T+G, where G is inserted after the T. Deletions are indicated as e.g. C-AC, where AC after the C is deleted. If the indels are heterozygous, the variant of the other allele is shown after a slash.

## Sheet: S09chr07
Genes in low diversity regions that have variants fixed in O. sativa
Genes	Transcripts	Directions	Positions	Variationa	Products	Variantsb
						OM	1	2	3	4	5	6	7	8	9	10	11	12	13	14	15	16	17	18	19	20	21	22	23	24	25	26	27	28	29	30	31	32
Os07t0220200	t00	Rev	6666956	Rep:CAC(H)->TAC(Y)	Similar to H0813E03.1 protein.	A	G	G	G	N	G	G	G	A	G	A	A	A	A	A	A	N	N	A	N	N	N	N	A	A	A	A	N	N	A	A	A	A
Os07t0222700	t01	For	6827672	Rep:AAG(K)->ATG(M)	Acyl carrier protein-like protein. (t01)	A	A	A	A	A	A	T	A	A	A	T	T	T	T	T	T	T	T	T	T	T	T	T	T	T	T	T	T	T	T	T	T	T
aRep indicates variants fixed in OS that result in an amino acid replacement. 5'UTR indicates variants close to annotated transcription start sites (putative promoter regions). The numbers indicate the relative position from the transcription start site, and from the translation start site in brackets. Note that the nucleotides shown here are according to the orientation of transcription. Thus, f…
bThe Sample identifiers correspond to those in Figure 2B. Insertions are indicated as e.g. T+G, where G is inserted after the T. Deletions are indicated as e.g. C-AC, where AC after the C is deleted. If the indels are heterozygous, the variant of the other allele is shown after a slash.

## Sheet: S10chr08
Genes in low diversity regions that have variants fixed in O. sativa
Genes	Transcripts	Directions	Positions	Variationa	Products	Variantsb
						OM	1	2	3	4	5	6	7	8	9	10	11	12	13	14	15	16	17	18	19	20	21	22	23	24	25	26	27	28	29	30	31	32
Os08t0478200	t01	Rev	23670152	5'UTR:-2(-113)	Similar to ATP synthase D chain; mitochondrial (EC 3.6.3.14).	A	G	G	G	G	G	G	G	G	G	A	N	A	A	A	A	A	N	A	N	A	A	N	A	A	A	A	N	A	A	A	A	A
Os08t0481000	t01	Rev	23850119	Rep:CAT(H)->TAT(Y)	Pentatricopeptide repeat domain containing protein. (t01)	A	G	G	G	G	G	G	R	G	G	A	A	A	A	A	A	A	A	A	A	A	A	A	A	A	A	A	A	A	A	A	A	A
Os08t0481000	t01	Rev	23851767	5'UTR:-16(-24)	Pentatricopeptide repeat domain containing protein. (t01)	N	A+CTCT	A+CTCT	A+CTCT	A+CTCT	A+CTCT	A+CTCT	A/A+CTCT	A+CTCT	A+CTCT	A	A	A	A	A	A	A	A	A	A	A	A	A	A	A	A	A	A	A	A	A	A	A
Os08t0481000	t01	Rev	23851797	5'UTR:-46(-54)	Pentatricopeptide repeat domain containing protein. (t01)	N	T	T	T	T	T	T	K	T	T	G	G	G	G	G	G	G	G	G	G	G	G	G	G	G	G	G	G	G	G	G	G	G
Os08t0481000	t02	Rev	23850119	Rep:CAT(H)->TAT(Y)	Pentatricopeptide repeat domain containing protein. (t02)	A	G	G	G	G	G	G	R	G	G	A	A	A	A	A	A	A	A	A	A	A	A	A	A	A	A	A	A	A	A	A	A	A
Os08t0481000	t02	Rev	23851767	5'UTR:-23(-24)	Pentatricopeptide repeat domain containing protein. (t02)	N	A+CTCT	A+CTCT	A+CTCT	A+CTCT	A+CTCT	A+CTCT	A/A+CTCT	A+CTCT	A+CTCT	A	A	A	A	A	A	A	A	A	A	A	A	A	A	A	A	A	A	A	A	A	A	A
Os08t0481000	t02	Rev	23851797	5'UTR:-53(-54)	Pentatricopeptide repeat domain containing protein. (t02)	N	T	T	T	T	T	T	K	T	T	G	G	G	G	G	G	G	G	G	G	G	G	G	G	G	G	G	G	G	G	G	G	G
Os08t0481000	t03	Rev	23851767	5'UTR:-23(-24)	Hypothetical conserved gene. (t03)	N	A+CTCT	A+CTCT	A+CTCT	A+CTCT	A+CTCT	A+CTCT	A/A+CTCT	A+CTCT	A+CTCT	A	A	A	A	A	A	A	A	A	A	A	A	A	A	A	A	A	A	A	A	A	A	A
Os08t0481000	t03	Rev	23851797	5'UTR:-53(-54)	Hypothetical conserved gene. (t03)	N	T	T	T	T	T	T	K	T	T	G	G	G	G	G	G	G	G	G	G	G	G	G	G	G	G	G	G	G	G	G	G	G
Os08t0481400	t01	Rev	23892344	Del:{GAG}4GAC(EEEED)->{GAG}3GAC(EEE_D)	Similar to HAHB-7 (Fragment). (t01)	N	N	G+TCC	G+GCC	G	G+TCC	G+TCC	G	G+TCC	G+TCC	G+TCC	G	G	N	N	N	N	N	G	G	G	G	G	G	G	G	G	G	N	N	G	G	G
Os08t0481400	t02	Rev	23892344	Del:{GAG}4GAC(EEEED)->{GAG}3GAC(EEE_D)	Similar to HAHB-7 (Fragment). (t02)	N	N	G+TCC	G+GCC	G	G+TCC	G+TCC	G	G+TCC	G+TCC	G+TCC	G	G	N	N	N	N	N	G	G	G	G	G	G	G	G	G	G	N	N	G	G	G
Os08t0481500	t01	For	23896310	Rep:CCC(P)->TCC(S)	Conserved hypothetical protein.	N	C	C	C	C	C	C	T	C	C	T	T	T	T	T	T	T	T	T	T	T	T	T	T	T	T	T	T	T	T	T	T	T
Os08t0481950	t01	For	23917202	5'UTR:-185(-957)	Similar to predicted protein.	N	T	T	T	T	N	T	C	T	T	T	C	C	C	C	C	C	C	C	C	C	C	C	C	C	C	C	C	C	C	C	C	C
Os08t0481950	t01	For	23918343	Rep:GCG(A)->GTG(V)	Similar to predicted protein.	C	C	C	C	C	C	C	Y	C	C	T	T	T	T	T	T	T	T	T	T	T	T	T	T	T	T	T	T	T	T	T	T	T
Os08g0482100	t01	For	23925348	Rep:GGA(G)->GAA(E)	LETM1-like domain containing protein. (t01)	G	G	G	G	G	G	G	R	G	G	G	A	A	A	A	A	A	A	A	A	A	A	A	A	A	A	A	A	A	A	A	A	A
Os08g0482100	t01	For	23925601	Rep:CGT(R)->CAT(H)	LETM1-like domain containing protein. (t01)	G	G	G	G	R	G	G	R	G	G	G	A	A	A	A	A	A	A	A	A	A	A	A	A	A	A	A	A	A	A	A	A	A
Os08g0482100	t01	For	23926221	Rep:GCC(A)->TCC(S)	LETM1-like domain containing protein. (t01)	G	G	G	G	G	G	G	K	G	G	T	T	T	T	T	T	T	T	T	T	T	T	T	T	T	T	T	T	T	T	T	T	T
Os08g0482100	t01	For	23929977	Rep:GAG(E)->CAG(Q)	LETM1-like domain containing protein. (t01)	G	G	G	G	G	G	G	C	G	G	C	C	C	C	C	C	C	C	C	C	C	C	C	C	C	C	C	C	C	C	C	C	C
Os08g0482100	t02	For	23925348	Rep:GGA(G)->GAA(E)	Similar to predicted protein. (t02)	G	G	G	G	G	G	G	R	G	G	G	A	A	A	A	A	A	A	A	A	A	A	A	A	A	A	A	A	A	A	A	A	A
Os08g0482100	t02	For	23925601	Rep:CGT(R)->CAT(H)	Similar to predicted protein. (t02)	G	G	G	G	R	G	G	R	G	G	G	A	A	A	A	A	A	A	A	A	A	A	A	A	A	A	A	A	A	A	A	A	A
Os08g0482100	t02	For	23926221	Rep:GCC(A)->TCC(S)	Similar to predicted protein. (t02)	G	G	G	G	G	G	G	K	G	G	T	T	T	T	T	T	T	T	T	T	T	T	T	T	T	T	T	T	T	T	T	T	T
Os08g0482100	t02	For	23929977	Rep:GAG(E)->CAG(Q)	Similar to predicted protein. (t02)	G	G	G	G	G	G	G	C	G	G	C	C	C	C	C	C	C	C	C	C	C	C	C	C	C	C	C	C	C	C	C	C	C
Os08g0483900	t01	Rev	23984291	Rep:GTG(V)->GCG(A)	Helix-loop-helix DNA-binding domain containing protein.	N	A	A	A	A	A	A	R	A	A	A	G	N	G	G	G	G	G	G	G	G	G	G	G	G	G	G	G	G	G	G	G	G
Os08g0485300	t00	For	24072102	Rep:CCG(P)->TCG(S)	Hypothetical conserved gene.	N	C	C	C	C	C	T	Y	C	C	C	T	T	N	T	T	T	T	N	T	T	N	T	T	N	T	T	N	T	T	T	T	T
Os08g0485700	t01	For	24102947	5'UTR:-120(-280)	Methyl-CpG DNA binding domain containing protein. (t01)	C	C	C	T	C	Y	C	Y	C	N	C	T	T	T	T	T	T	N	T	T	T	T	T	T	T	T	T	T	T	T	T	T	T
Os08g0485700	t01	For	24103579	Rep:ACC(T)->ATC(I)	Methyl-CpG DNA binding domain containing protein. (t01)	C	C	C	C	C	C	C	Y	C	C	C	T	T	T	T	N	T	T	T	N	T	T	T	T	T	T	T	N	T	T	T	N	T
Os08g0490700	t01	For	24343472	Rep:GTC(V)->ATC(I)	Conserved hypothetical protein. (t01)	N	G	G	G	A	G	A	R	G	G	G	A	A	A	A	A	N	A	A	A	A	A	N	A	A	A	A	A	A	A	A	A	A
Os08g0490700	t01	For	24343614	Rep:TCC(S)->TTC(F)	Conserved hypothetical protein. (t01)	N	C	C	C	C	C	T	Y	C	C	C	N	T	T	T	T	T	T	T	T	T	T	T	T	T	T	T	T	T	T	T	T	T
Os08g0490700	t01	For	24344021	Rep:GCG(A)->ACG(T)	Conserved hypothetical protein. (t01)	N	G	G	G	G	G	A	R	G	G	A	A	A	A	A	N	A	N	A	A	A	A	N	A	A	N	A	A	A	A	A	A	A
Os08g0490700	t02	For	24343472	Rep:GTC(V)->ATC(I)	Conserved hypothetical protein. (t02)	N	G	G	G	A	G	A	R	G	G	G	A	A	A	A	A	N	A	A	A	A	A	N	A	A	A	A	A	A	A	A	A	A
Os08g0490700	t02	For	24343614	Rep:TCC(S)->TTC(F)	Conserved hypothetical protein. (t02)	N	C	C	C	C	C	T	Y	C	C	C	N	T	T	T	T	T	T	T	T	T	T	T	T	T	T	T	T	T	T	T	T	T
Os08g0490700	t02	For	24344021	Rep:GCG(A)->ACG(T)	Conserved hypothetical protein. (t02)	N	G	G	G	G	G	A	R	G	G	A	A	A	A	A	N	A	N	A	A	A	A	N	A	A	N	A	A	A	A	A	A	A
Os08g0491400	t01	For	24370813	5'UTR:-52(-153)	Interferon-related developmental regulator domain containing protein.	G	G	G	A	G	G	G	A	G	G	G	A	A	A	A	A	A	A	A	A	A	A	A	A	A	A	A	A	A	A	A	A	A
Os08g0495200	t00	For	24536690	Rep:CAA(Q)->CGA(R)	Hypothetical conserved gene.	A	A	A	A	A	A	A	G	A	A	G	G	G	G	G	G	G	G	G	G	G	G	G	G	G	G	G	G	G	G	G	G	G
Os08g0495200	t00	For	24536697	FrameShift	Hypothetical conserved gene.	A+G	A+G	A+G	A+G	A+G	A+G	A+G	A/A+G	A+G	A+G	A	A	A	A	A	A	A	A	A	A	A	A	A	A	A	A	A	A	A	A	A	A	A
Os08g0495200	t00	For	24536704	Rep:TTC(F)->GTC(V)	Hypothetical conserved gene.	T	T	T	T	T	T	T	K	T	T	T	G	G	G	G	G	G	G	G	G	G	G	G	G	G	G	G	G	G	G	G	G	G
Os08g0495200	t00	For	24536722	Rep:GTG(V)->CTG(L)	Hypothetical conserved gene.	G	G	G	G	G	G	G	C	G	G	C	C	C	C	C	C	C	C	C	C	C	C	C	C	C	C	C	C	C	C	C	C	C
Os08g0495200	t00	For	24536788	Rep:TGG(W)->CGG(R)	Hypothetical conserved gene.	T	T	T	T	T	T	T	C	T	T	C	C	C	C	C	C	C	C	C	C	C	C	C	C	C	C	C	C	C	C	C	C	C
Os08g0495200	t00	For	24538121	Rep:TGT(C)->CGT(R)	Hypothetical conserved gene.	C	T	T	T	T	T	T	Y	T	T	C	C	C	C	C	C	C	C	C	C	C	C	C	C	C	C	C	C	C	C	C	C	C
Os08g0495200	t00	For	24538176	Rep:GAA(E)->GCA(A)	Hypothetical conserved gene.	C	A	A	A	A	A	A	M	A	A	C	C	C	C	C	C	C	C	C	C	C	C	C	C	C	C	C	C	C	C	C	C	C
Os08g0495200	t00	For	24538199	Rep:AAC(N)->GAC(D)	Hypothetical conserved gene.	A	A	A	A	A	A	A	R	A	A	G	G	G	G	G	G	G	G	G	G	G	G	G	G	G	G	G	G	G	G	G	G	G
Os08g0495200	t00	For	24538224	Rep:AAA(K)->AGA(R)	Hypothetical conserved gene.	A	A	A	A	A	A	A	R	A	A	G	G	G	G	G	G	G	G	G	G	G	G	G	G	G	G	G	G	G	G	G	G	G
Os08g0495200	t00	For	24538854	Rep:GAC(D)->GAA(E)	Hypothetical conserved gene.	C	C	C	C	C	C	C	M	C	C	A	A	A	A	A	A	A	A	A	A	A	A	A	A	A	A	A	A	A	A	A	A	A
Os08g0495300	t01	For	24543700	Rep:AAG(K)->CAG(Q)	Similar to cDNA clone:J013000K10; full insert sequence.	C	A	A	A	A	A	A	M	A	A	C	C	C	C	C	C	C	C	C	C	C	C	C	C	C	C	C	C	C	C	C	C	C
Os08g0495300	t01	For	24543775	Rep:CAC(H)->GAC(D)	Similar to cDNA clone:J013000K10; full insert sequence.	C	C	C	C	C	C	C	S	C	C	G	G	G	G	G	G	G	G	G	G	G	G	G	G	G	G	G	G	G	G	G	G	G
Os08g0495300	t01	For	24544290	Rep:GAC(D)->AAT(N)	Similar to cDNA clone:J013000K10; full insert sequence.	G	G	G	G	G	G	G	R	G	G	G	A	A	A	A	A	A	A	A	A	A	A	A	A	A	A	A	A	A	A	A	A	A
Os08g0495300	t01	For	24544292	Rep:GAC(D)->AAT(N)	Similar to cDNA clone:J013000K10; full insert sequence.	C	C	C	C	C	C	C	Y	C	C	C	T	T	T	T	T	T	T	T	T	T	T	T	T	T	T	T	T	T	T	T	T	T
Os08g0495800	t01	For	24563124	5'UTR:-103(-209)	Kelch related domain containing protein.	N	C	C	T	C	C	C	T	C	C	C	T	T	T	T	T	T	T	T	T	T	T	T	T	T	T	T	T	T	T	T	T	T
Os08g0495800	t02	For	24563124	5'UTR:-109(-209)	Kelch related domain containing protein.	N	C	C	T	C	C	C	T	C	C	C	T	T	T	T	T	T	T	T	T	T	T	T	T	T	T	T	T	T	T	T	T	T
Os08g0496200	t00	For	24585106	Rep:GTC(V)->ATC(I)	Similar to Glycosyl transferase-like protein (Fragment).	G	G	G	G	G	G	G	R	G	G	G	A	A	A	A	A	A	A	A	A	A	A	A	A	A	A	A	A	A	A	A	A	A
Os08g0496400	t01	For	24591910	5'UTR:-45(-175)	Conserved hypothetical protein.	N	T	T	T	T	T	T	Y	T	T	T	C	C	C	C	C	C	C	C	C	C	C	C	C	C	C	C	C	C	C	C	C	C
Os08g0496400	t01	For	24592042	5'UTR:+87(-43)	Conserved hypothetical protein.	C	C	C	C	C	C	G	G	C	C	C	G	G	G	G	G	G	G	G	G	G	G	G	G	G	G	G	G	G	G	G	G	G
Os08g0496400	t01	For	24602456	Rep:GTA(V)->ATA(I)	Conserved hypothetical protein.	G	G	G	G	G	N	G	A	G	G	G	A	A	A	A	A	A	A	A	A	A	A	A	A	A	A	A	A	A	A	A	A	A
Os08g0496500	t01	For	24605405	5'UTR:-198(-280)	Histone-fold domain containing protein.	K	G	G	G	G	N	G	A	G	G	A	A	A	A	A	A	A	A	A	A	A	A	A	A	A	A	A	A	A	A	A	A	A
Os08g0496500	t01	For	24605426	5'UTR:-177(-259)	Histone-fold domain containing protein.	G	A	A	A	A	N	A	G	A	N	G	G	G	G	G	G	G	G	G	G	G	G	G	G	G	G	G	G	G	G	G	G	G
Os08g0496500	t01	For	24605453	5'UTR:-150(-232)	Histone-fold domain containing protein.	N	G	G	G	G	N	G	T	G	G	T	T	T	T	T	T	T	T	T	T	T	T	T	T	T	T	T	T	T	T	T	T	T
Os08g0496500	t01	For	24605458	5'UTR:-145(-227)	Histone-fold domain containing protein.	N	A	A	A	A	N	A	G	A	A	A	G	G	G	G	G	G	G	G	G	G	G	G	G	G	G	G	G	G	G	G	G	G
Os08g0496800	t01	For	24621237	5'UTR:-29(-103)	Similar to RAFTIN1a protein (RAFTIN1a anther protein).	A	G	G	G	G	A	G	R	G	G	A	A	A	A	A	N	A	N	A	A	N	A	A	A	A	A	A	A	A	A	A	N	A
Os08g0496800	t01	For	24621315	5'UTR:+49(-25)	Similar to RAFTIN1a protein (RAFTIN1a anther protein).	N	G-TC	G-TC	G-TC	G-TC	G/G-TC	G-TC	G/G-TC	G-TC	G-TC	G	G	G	G	G	G	G	G	G	G	G	G	G	G	G	G	G	G	G	G	G	G	G
Os08g0496800	t01	For	24622622	Rep:GAC(D)->AAC(N)	Similar to RAFTIN1a protein (RAFTIN1a anther protein).	G	G	G	G	G	G	A	R	G	G	G	A	A	A	A	A	N	A	A	A	A	A	A	A	A	A	A	A	A	A	A	A	A
Os08g0498400	t01	Rev	24682112	Rep:AAG(K)->AAC(N)	Similar to Caffeoyl-CoA 3-O-methyltransferase (Fragment). (t01)	C	C	C	C	C	C	C	S	C	C	G	G	G	G	G	G	G	G	G	G	G	G	G	G	G	G	G	N	G	G	G	G	G
Os08g0498400	t01	Rev	24685569	5'UTR:-39(-107)	Similar to Caffeoyl-CoA 3-O-methyltransferase (Fragment). (t01)	C-T	C-T	C-T	C-T	C-T	C-T	C-T	C/C-T	C-T	C-T	C-T	C	C	C	C	C	C	C	C	C	C	C	C	C	C	C	C	C	C	C	C	C	C
Os08g0498400	t02	Rev	24682112	Rep:AAG(K)->AAC(N)	Similar to Caffeoyl-CoA O-methyltransferase (Fragment). (t02)	C	C	C	C	C	C	C	S	C	C	G	G	G	G	G	G	G	G	G	G	G	G	G	G	G	G	G	N	G	G	G	G	G
Os08g0499100	t01	For	24722052	Rep:ACC(T)->GCC(A)	ATPase; AAA+ type; core domain containing protein. (t01)	A	A	A	A	M	A	M	R	A	A	A	G	G	G	G	G	G	G	G	G	G	G	G	G	G	G	G	G	G	G	G	G	G
Os08g0499300	t01	Rev	24735067	Rep:GAT(D)->TAT(Y)	WRKY transcription factor 30. (t01)	C	C	C	C	C	C	C	M	C	C	A	A	A	A	A	A	A	A	A	A	A	A	A	A	A	A	A	A	A	A	A	A	A
Os08g0499300	t02	Rev	24735067	Rep:GAT(D)->TAT(Y)	Similar to WRKY transcription factor 30. (t02)	C	C	C	C	C	C	C	M	C	C	A	A	A	A	A	A	A	A	A	A	A	A	A	A	A	A	A	A	A	A	A	A	A
Os08g0499400	t01	For	24744994	5'UTR:-90(-122)	Conserved hypothetical protein.	T	T	T	T	T	T	T	C	T	T	T	C	C	C	C	C	C	C	C	C	C	C	C	C	C	C	C	C	C	C	C	C	C
Os08g0499400	t01	For	24746164	Rep:CGT(R)->CAT(H)	Conserved hypothetical protein.	G	G	G	G	G	G	G	R	G	G	A	A	A	A	A	A	A	A	A	A	A	A	A	A	A	A	A	A	A	A	A	A	A
Os08g0499400	t01	For	24746190	Rep:GCT(A)->ACT(T)	Conserved hypothetical protein.	G	G	G	G	G	G	G	R	G	G	G	A	A	A	A	A	A	A	A	A	A	A	A	A	A	A	A	A	A	A	A	A	A
Os08g0499700	t01	For	24753679	5'UTR:-134(-686)	Similar to Pherophorin-S precursor. (t01)	N	N	N	N	T	C	C	Y	C	C	N	T	T	T	T	T	T	T	T	T	T	T	T	T	T	T	T	T	T	T	T	T	T
Os08g0499700	t01	For	24754624	Rep:TGT(C)->TAT(Y)	Similar to Pherophorin-S precursor. (t01)	G	G	G	G	G	N	N	R	G	G	G	A	A	N	A	A	N	N	N	A	A	N	A	A	A	A	A	A	A	A	A	A	A
Os08g0499700	t02	For	24753679	5'UTR:-159(-686)	Similar to Pherophorin-S precursor. (t02)	N	N	N	N	T	C	C	Y	C	C	N	T	T	T	T	T	T	T	T	T	T	T	T	T	T	T	T	T	T	T	T	T	T
Os08g0499700	t02	For	24754624	Rep:TGT(C)->TAT(Y)	Similar to Pherophorin-S precursor. (t02)	G	G	G	G	G	N	N	R	G	G	G	A	A	N	A	A	N	N	N	A	A	N	A	A	A	A	A	A	A	A	A	A	A
Os08g0499800	t01	For	24761812	Rep:CGC(R)->AGC(S)	Pentatricopeptide repeat domain containing protein. (t01)	C	C	C	C	C	C	C	M	C	C	C	A	A	A	A	A	A	A	A	A	A	A	A	A	A	A	A	A	A	A	A	A	A
Os08g0500100	t01	For	24773318	5'UTR:+27(-71)	Similar to Peroxisomal targeting signal 1 receptor short form. (t01)	N	C	C	C	C	C	C	Y	C	C	C	T	T	T	T	T	T	T	T	T	T	T	T	T	T	T	T	T	T	T	T	T	T
Os08g0500100	t02	For	24773318	5'UTR:+25(-71)	Similar to Peroxisomal targeting sequence 1 receptor (Fragment). (t02)	N	C	C	C	C	C	C	Y	C	C	C	T	T	T	T	T	T	T	T	T	T	T	T	T	T	T	T	T	T	T	T	T	T
Os08g0500200	t01	Rev	24784468	Rep:ATC(I)->GTC(V)	Conserved hypothetical protein. (t01)	T	T	T	T	T	T	T	Y	T	T	T	C	C	C	C	C	C	C	C	C	C	C	C	C	C	C	C	C	C	C	C	C	C
Os08g0500200	t01	Rev	24784690	Rep:GGA(G)->AGA(R)	Conserved hypothetical protein. (t01)	C	C	C	C	C	C	C	Y	C	C	C	T	T	T	T	T	T	T	T	T	T	T	T	T	T	T	T	T	T	T	T	T	T
Os08g0500200	t01	Rev	24787062	5'UTR:-158(-326)	Conserved hypothetical protein. (t01)	N	A+G	A+G	A+G	A+G	A+G	A+G	A/A+G	A+G	A+G	A	A	A	A	A	A	A	A	A	A	A	A	A	A	A	A	A	A	A	A	A	A	A
Os08g0500200	t02	Rev	24787062	5'UTR:-158(-326)	Similar to predicted protein. (t02)	N	A+G	A+G	A+G	A+G	A+G	A+G	A/A+G	A+G	A+G	A	A	A	A	A	A	A	A	A	A	A	A	A	A	A	A	A	A	A	A	A	A	A
Os08g0500600	t01	For	24805470	Rep:CAC(H)->AAC(N)	Pentatricopeptide repeat domain containing protein.	C	C	C	C	C	C	C	M	C	C	A	A	A	A	A	A	A	A	A	A	A	A	A	A	A	A	A	A	A	A	A	A	A
Os08g0500600	t01	For	24805629	Rep:GCC(A)->TCC(S)	Pentatricopeptide repeat domain containing protein.	G	G	G	G	G	G	G	K	G	G	T	T	T	T	T	T	T	T	T	T	T	T	T	T	T	T	T	T	T	T	T	T	T
Os08g0500800	t01	For	24814805	5'UTR:-148(-839)	WLM domain containing protein.	T	T	T	T	T	T	T	W	T	T	T	A	A	A	A	A	A	A	A	A	A	A	A	A	A	A	A	A	A	A	A	A	A
Os08g0500800	t01	For	24814936	5'UTR:-17(-708)	WLM domain containing protein.	C	C	C	C	T	C	C	Y	C	C	T	T	T	T	T	T	T	T	T	T	T	T	T	T	T	T	T	T	T	T	T	T	T
Os08g0501600	t02	For	24863016	Rep:CAT(H)->TAT(Y)	Hypothetical conserved gene.	C	C	C	C	C	C	C	Y	C	T	C	T	T	T	T	T	T	T	T	T	T	T	T	T	T	T	T	T	T	T	T	T	T
aRep indicates variants fixed in OS that result in an amino acid replacement. 5'UTR indicates variants close to annotated transcription start sites (putative promoter regions). The numbers indicate the relative position from the transcription start site, and from the translation start site in brackets. Note that the nucleotides shown here are according to the orientation of transcription. Thus, f…
bThe Sample identifiers correspond to those in Figure 2B. Insertions are indicated as e.g. T+G, where G is inserted after the T. Deletions are indicated as e.g. C-AC, where AC after the C is deleted. If the indels are heterozygous, the variant of the other allele is shown after a slash.

[truncated: 1 more sheets: I08chr06.xls]
